# Supplementary material for: Novel Curcumin Inspired Bis-Chalcone Promotes Endoplasmic Reticulum Stress and Glioblastoma Neurosphere Cell Death
Source: MDPI journal article supplement (doi:10.3390/cancers11030357), 2019-03-13
Supplement: s1 [file s1]

# Supplementary Materials: Novel *Curcumin Inspired* Bis-Chalcone Promotes Endoplasmic Reticulum Stress and Glioblastoma Neurosphere Cell Death

Lorenzo Sansalone, Eduardo A. Veliz, Nadia G. Myrthil, Vasileios Stathias, Winston Walters, Ingrid I. Torrens, Stephan C. Schürer, Steven Vanni, Roger M. Leblanc and Regina M. Graham

## Glio3

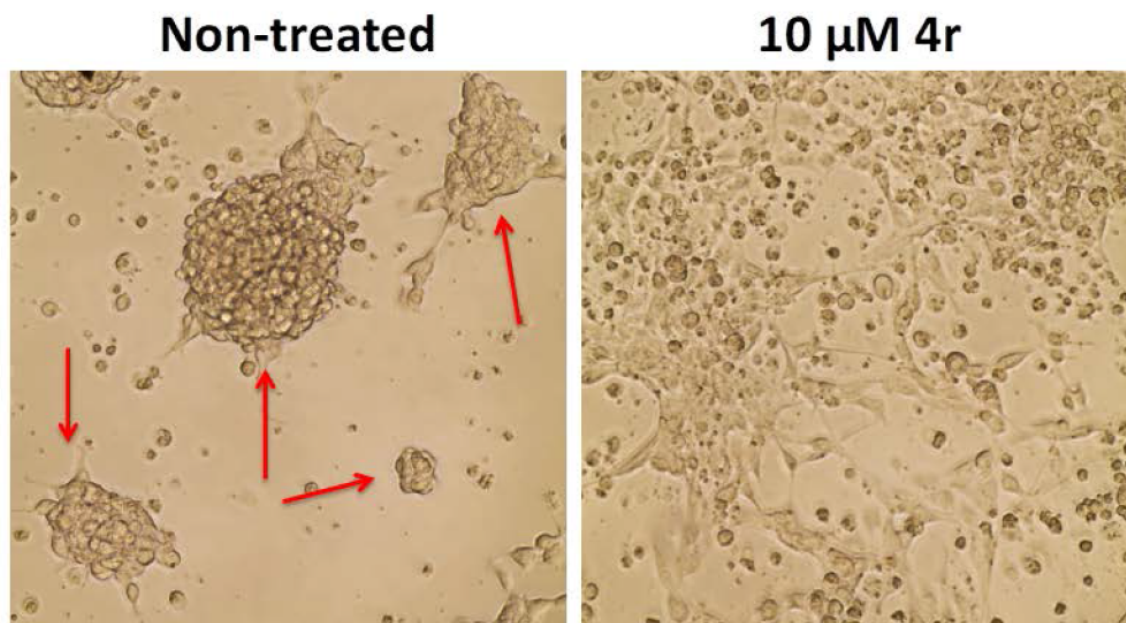

**Figure S1.** Bis-chalcone 4r promotes morphological changes consistent with cell differentiation. Glio3 cells were treated with 10  $\mu$ M bis-chalcone 4r for 3 days and examined by light microscopy. Arrows indicate neurospheres in non-treated cells.

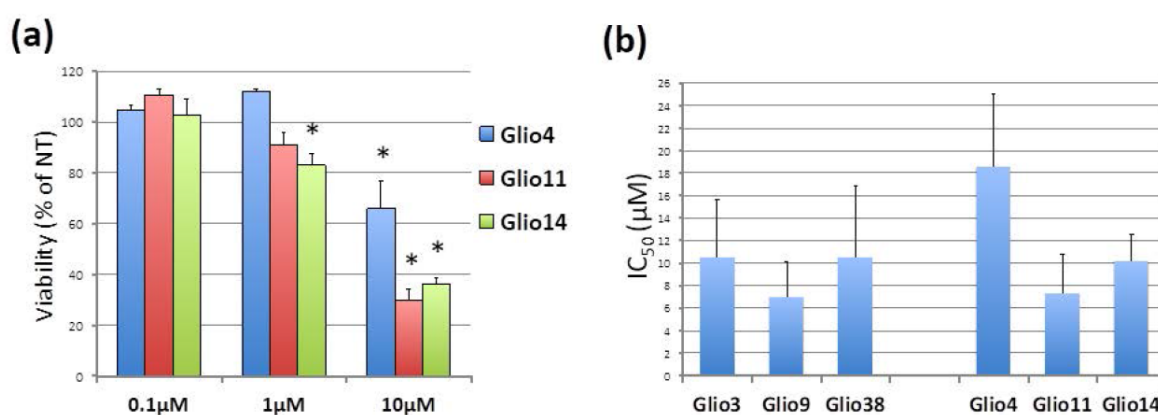

**Figure S2.** Bis-chalcone 4m induced cell death in 3 additional GSC lines. (a) Percent viability of bis-chalcone 4m treated Glio4, Glio11, and Glio14 cell lines. \*  $p < 0.05$  compared to non-treated controls. (b) IC<sub>50</sub> of 4m for each cell line tested.

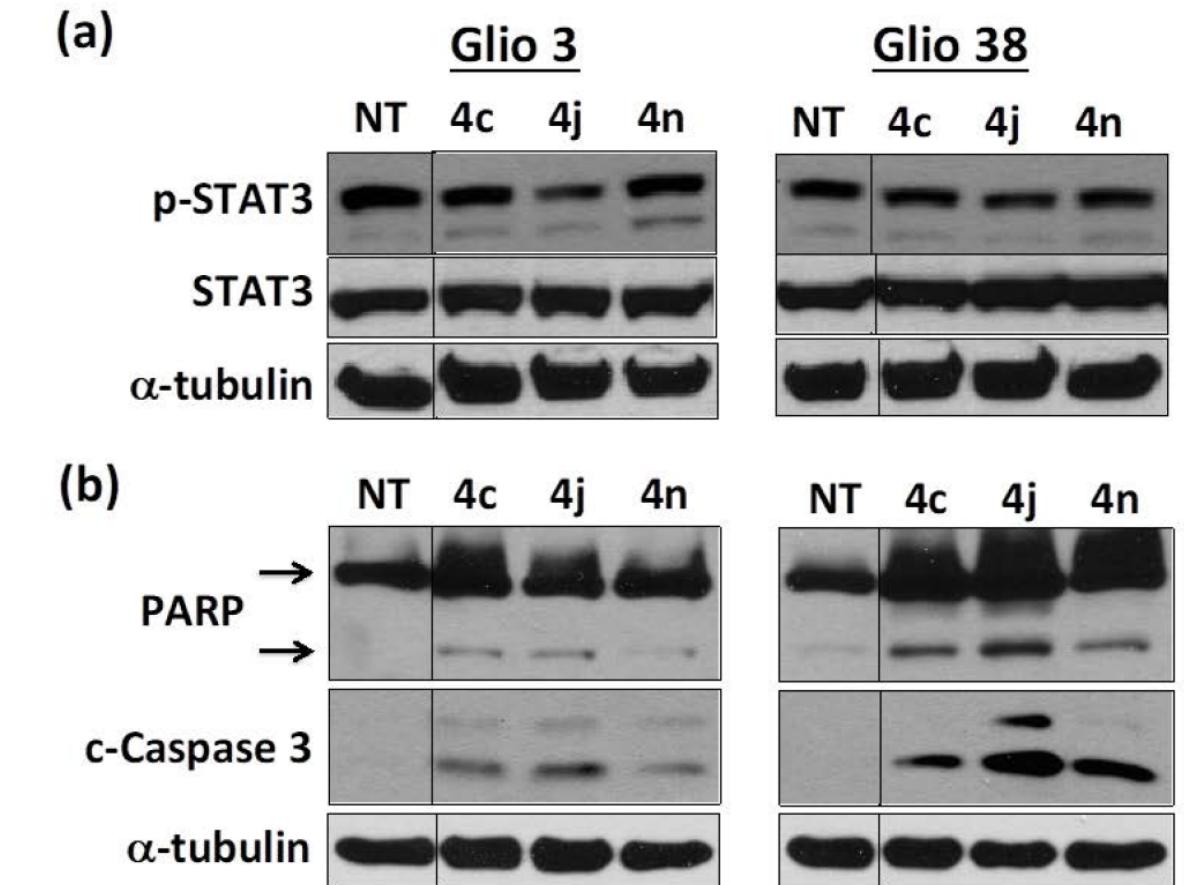

**Figure S3.** Bis-chalcones do not substantially reduce STAT3 activity. Glio3 and Glio38 were treated with 5  $\mu$ M of 4c, 4j and 4n and harvested 8 hours later. Levels of p-STAT3, STAT3, cleaved caspase 3 were examined by western blot analysis.

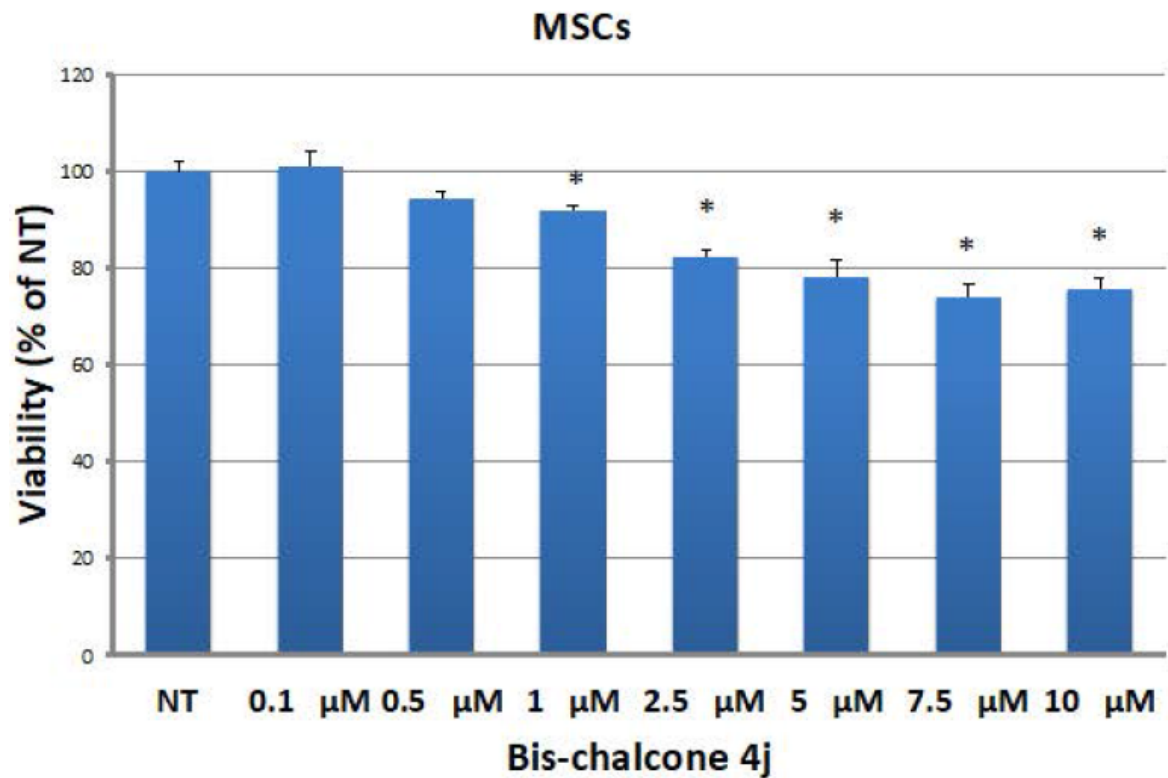

**Figure S4.** Bis-chalcone 4j is less toxic to human MSCs. MSCs were treated with 0.1  $\mu$ M -  $\mu$ 10 M 4j and percent viability determined at 72 hours by MTS assay. \*  $p < 0.05$ , compared to non-treated controls.

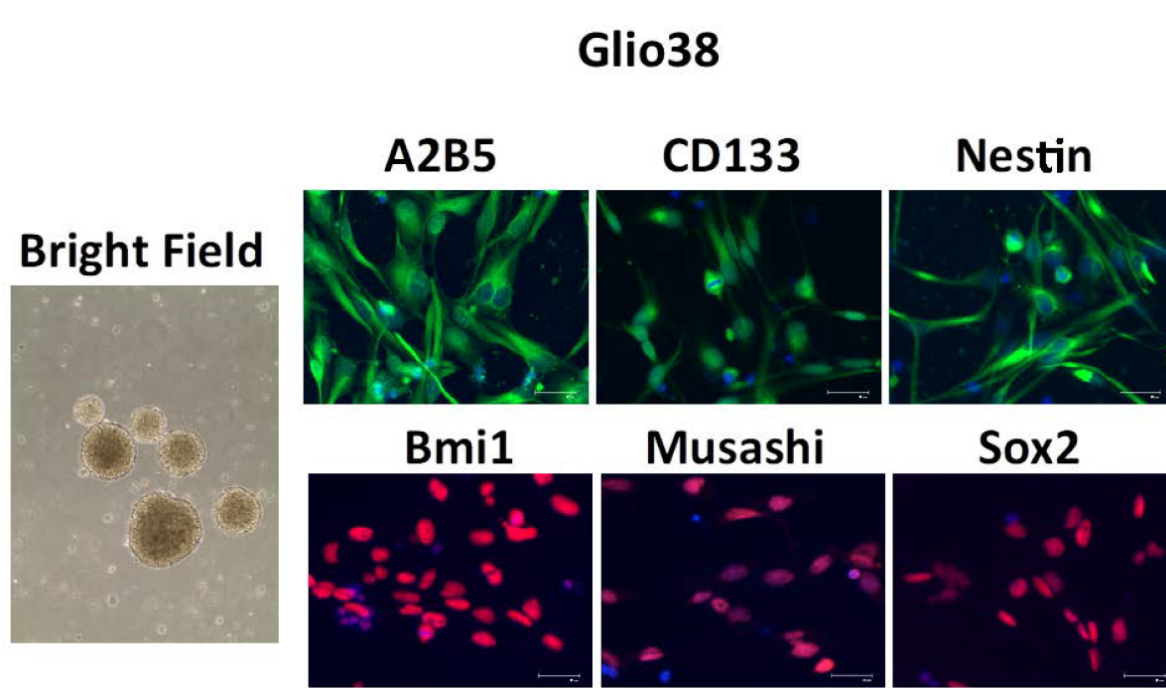

**Figure S5.** Glioblastoma Characterization. Bright field images indicate that Glioblastoma grows as neurospheres in defined media. Expression of putative stem cell markers A2B5, CD133, Nestin, Bmi1, Musashi and Sox2 were evaluated by immunocytochemistry.
