# Supplementary material for: Novel Curcumin Inspired Bis-Chalcone Promotes Endoplasmic Reticulum Stress and Glioblastoma Neurosphere Cell Death
Source: MDPI journal article supplement (doi:10.3390/cancers11030357), 2019-03-13
Supplement: s1 [file s1]

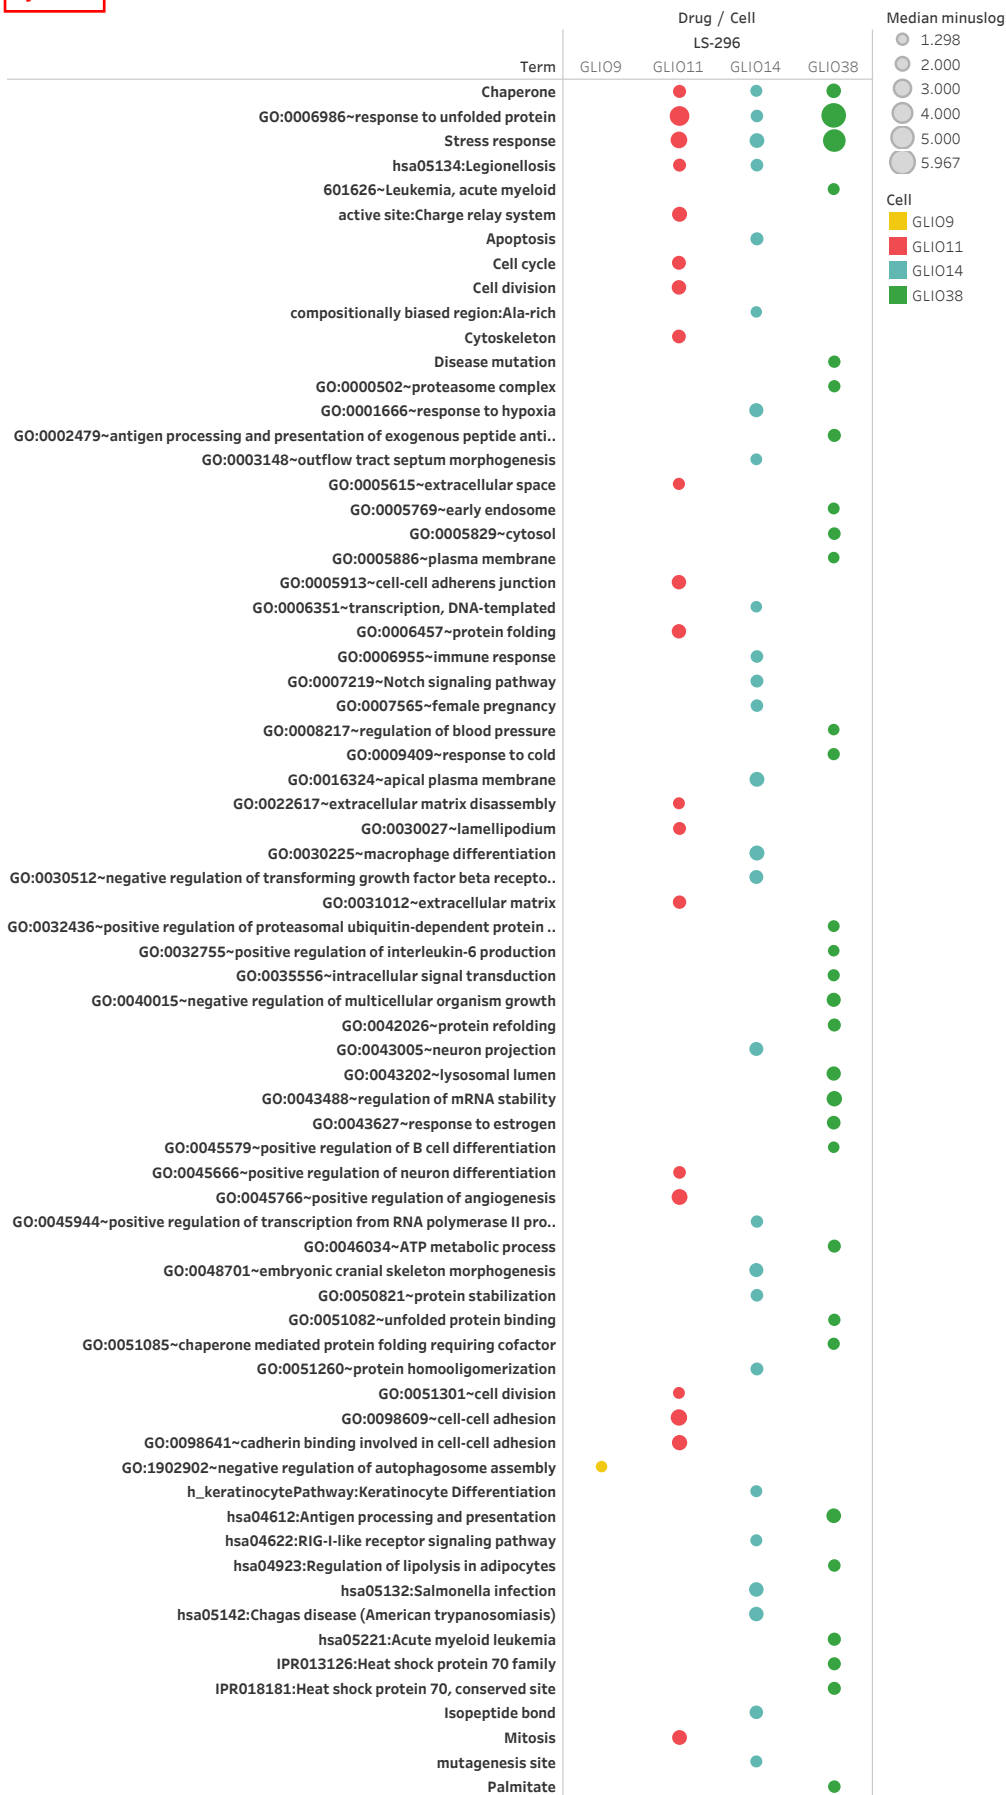

Cell (color) and median of minuslog (size) broken down by Drug and Cell vs. Term. The data is filtered on average of P Value, which ranges from 1.08e-06 to 0.0506. The view is filtered on Drug and Cell. The Drug filter keeps LS-296. The Cell filter keeps GLIO11, GLIO14, GLIO38 and GLIO9.

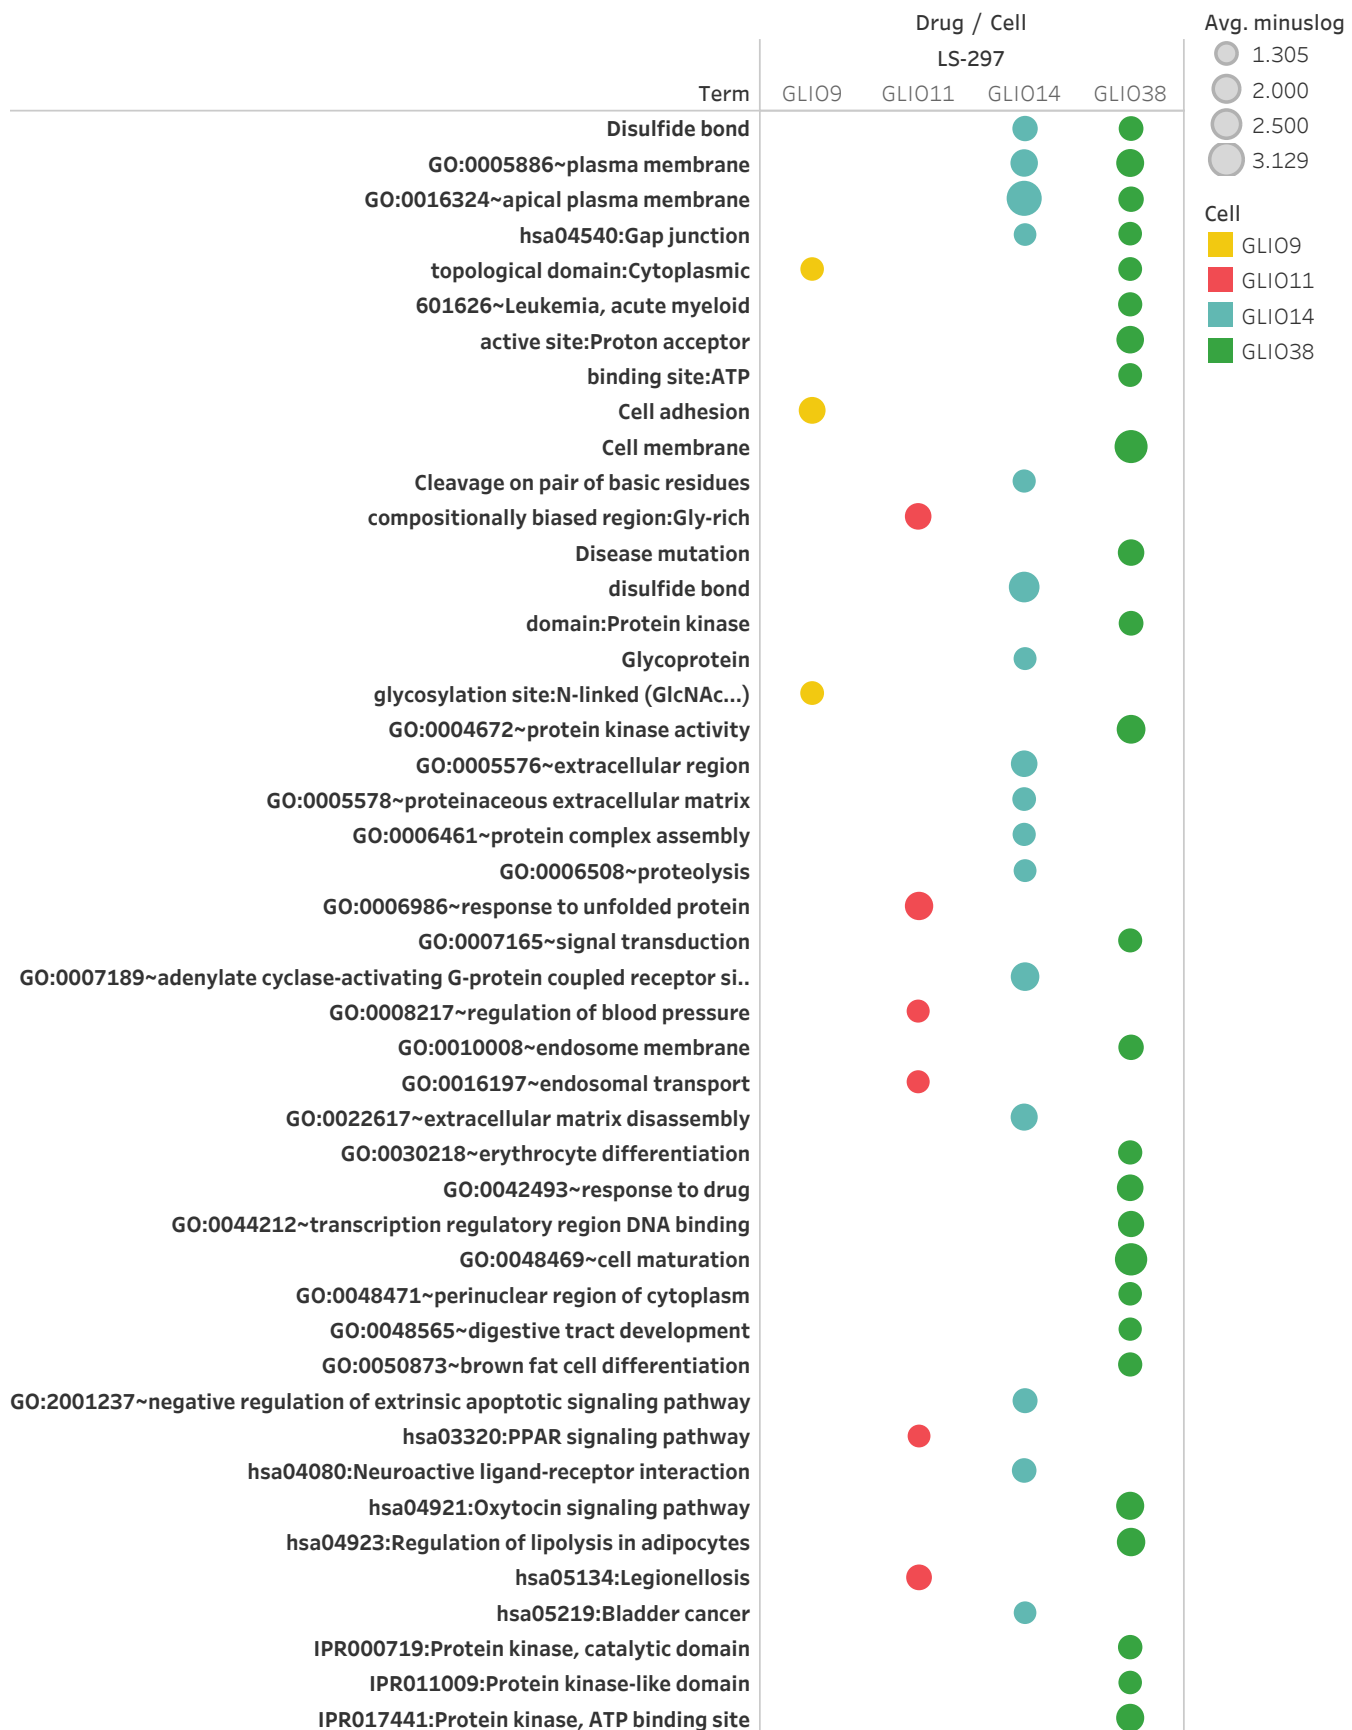

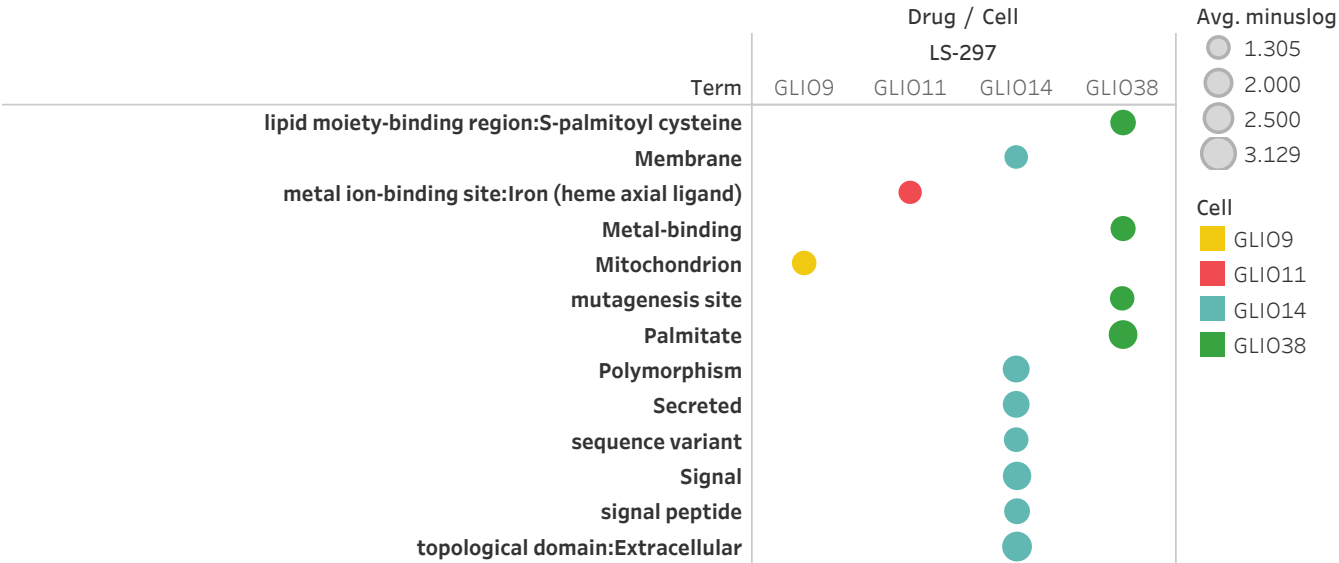

Cell (color) and average of minuslog (size) broken down by Drug and Cell vs. Term. The data is filtered on average of P Value, which ranges from 1.08e-06 to 0.05. The view is filtered on Term, Drug and Cell. The Term filter keeps 321 of 321 members. The Drug filter keeps LS-297. The Cell filter keeps GLI011, GLI014, GLI038 and GLI09.

# Curcumin

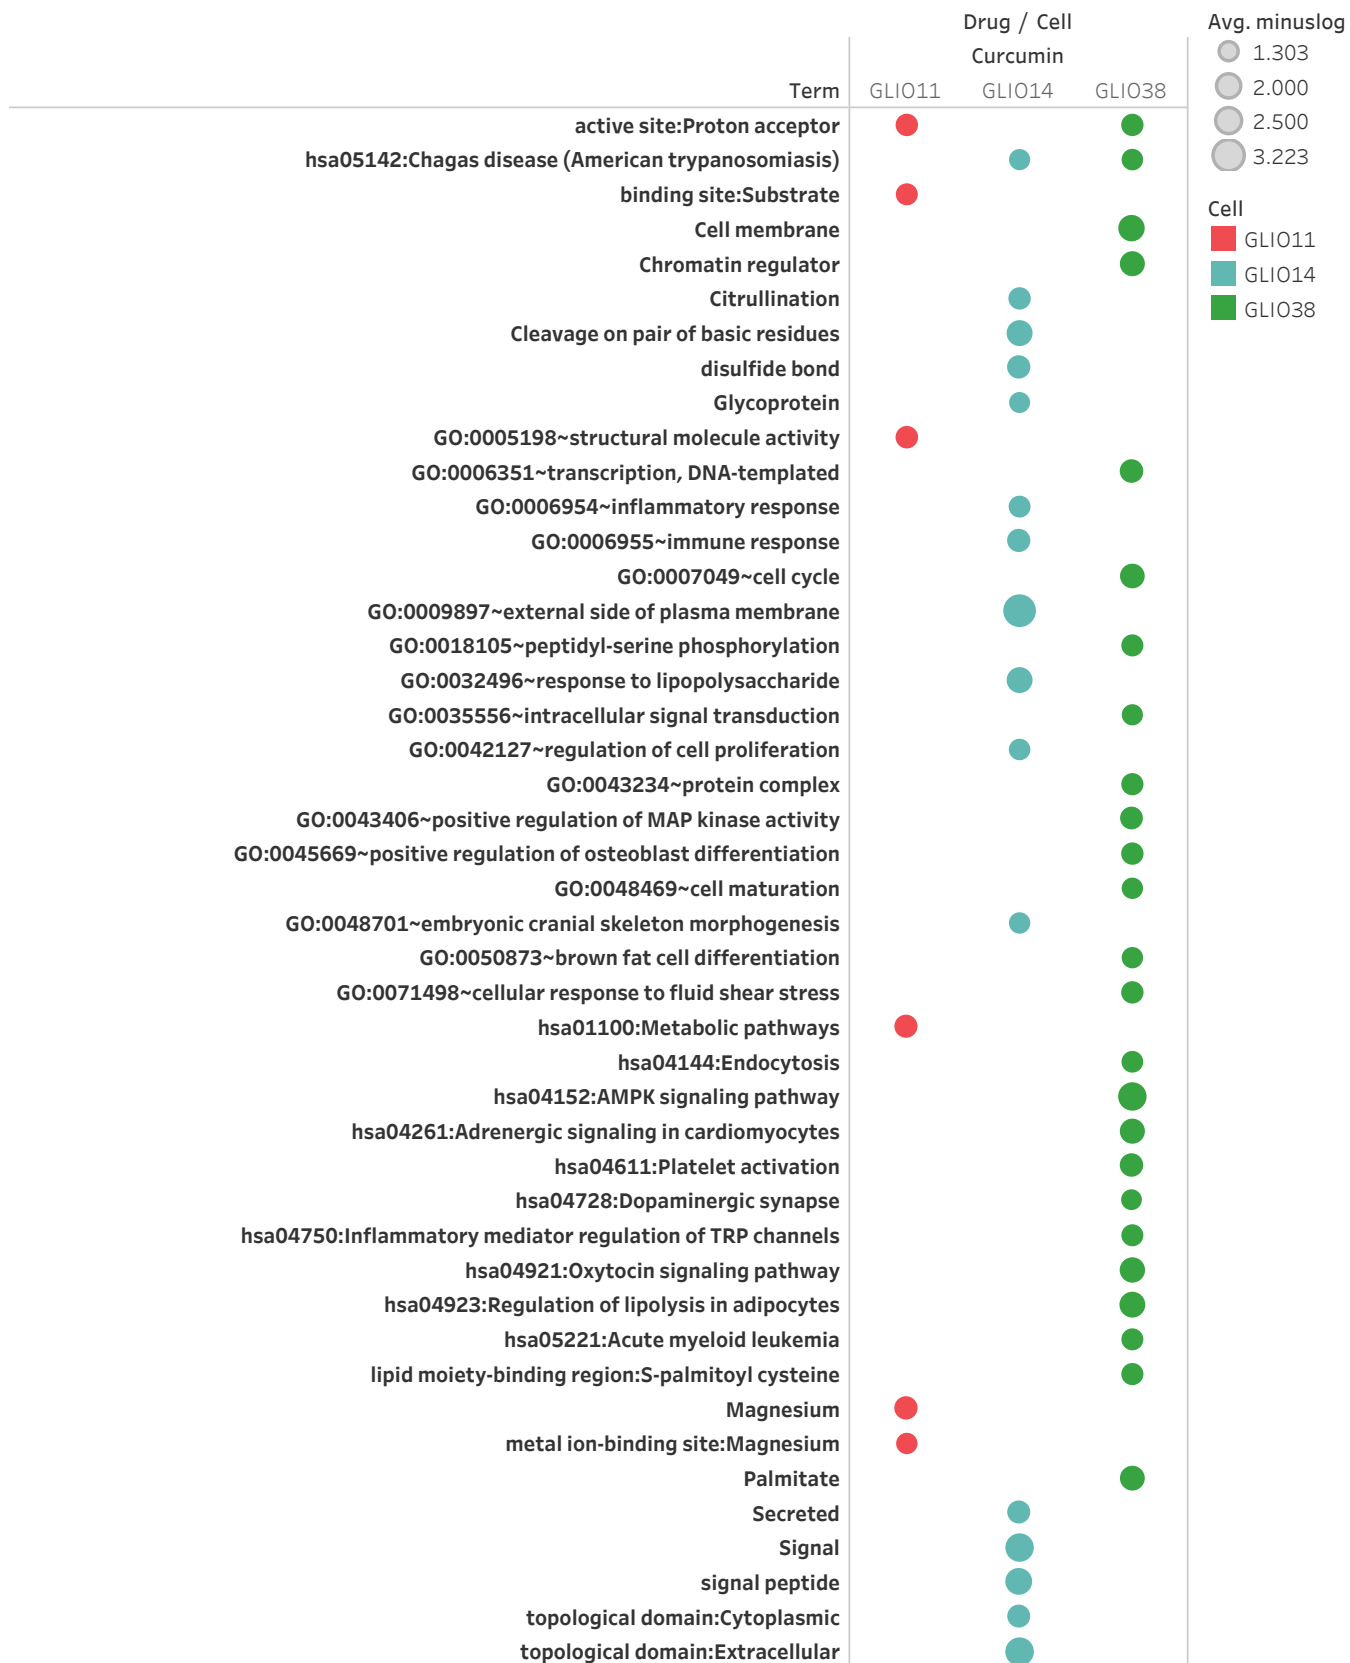

Cell (color) and average of minuslog (size) broken down by Drug and Cell vs. Term. The data is filtered on average of P Value, which ranges from 1.08e-06 to 0.0507. The view is filtered on Cell, Term and Drug. The Cell filter keeps GLIO11, GLIO14 and GLIO38. The Term filter keeps 321 of 321 members. The Drug filter keeps Curcumin.

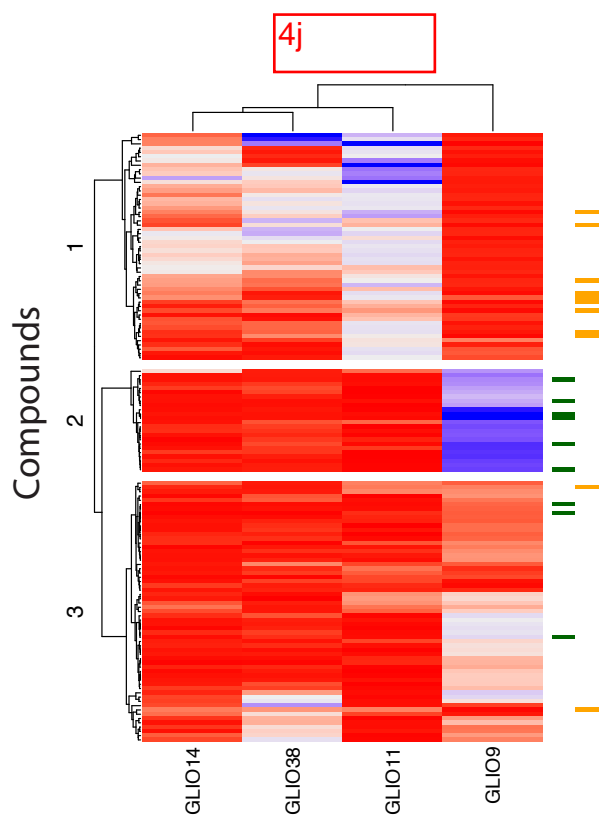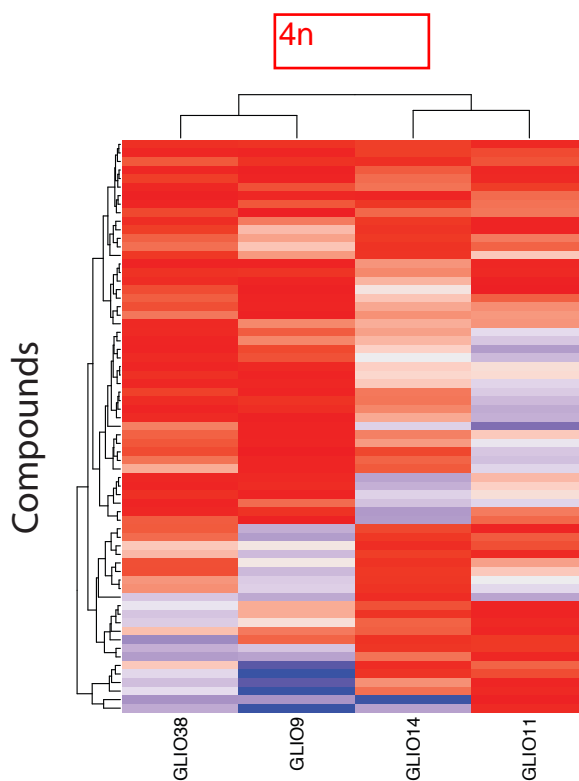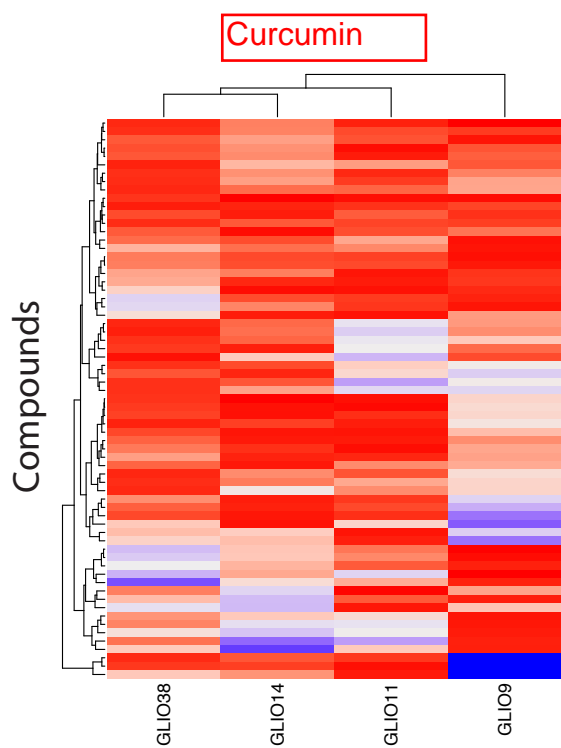

### Connectivity Score

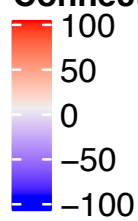

HSP inhibitors

Estrogen inhibitors

Table 1: Up regulated and down regulated genes accross all GSCs exposed to bis-chalcone 4j (LS 296), 4n (LS 297) and curcumin.

| Gene_Symbol | Gene_ID | CURCUMIN | LS-296 | LS-297 |
|-------------|---------|----------|--------|--------|
| PSME1       | 5720    | 0        | 0      | 0      |
| CISD1       | 55847   | 0        | 2      | 0      |
| VDAC1       | 7416    | 0        | 0      | 0      |
| SORBS3      | 10174   | 0        | 0      | 0      |
| SPDEF       | 25803   | 0        | 0      | 0      |
| ATF1        | 466     | 0        | 0      | 0      |
| SPAG4       | 6676    | 0        | 0      | 0      |
| E2F2        | 1870    | 0        | 0      | 0      |
| RHEB        | 6009    | 0        | 0      | 0      |
| IGF1R       | 3480    | 0        | 0      | 2      |
| SLC5A6      | 8884    | 0        | 0      | 0      |
| FOXO3       | 2309    | 0        | 0      | 0      |
| RGS2        | 5997    | 0        | 0      | 0      |
| GSTM2       | 2946    | 0        | 0      | 0      |
| SCYL3       | 57147   | 0        | 0      | 0      |
| RHOA        | 387     | 0        | -2     | 0      |
| TBX2        | 6909    | 0        | 0      | 0      |
| DNAJA3      | 9093    | 0        | 0      | 0      |
| IL1B        | 3553    | 0        | 0      | 0      |
| ASAH1       | 427     | 0        | 0      | -2     |
| DCUN1D4     | 23142   | 0        | 0      | 0      |
| DYRK3       | 8444    | 0        | 0      | 0      |
| RALA        | 5898    | 0        | 0      | 0      |
| ARHGEF12    | 23365   | 0        | 0      | 0      |

|          |       |    |   |   |
|----------|-------|----|---|---|
| POLG2    | 11232 | 0  | 0 | 0 |
| SOX2     | 6657  | 0  | 0 | 0 |
| TRAPPC3  | 27095 | 0  | 0 | 0 |
| SERPINE1 | 5054  | 0  | 0 | 0 |
| TCFL5    | 10732 | -2 | 0 | 0 |
| CRK      | 1398  | 0  | 0 | 0 |
| HLA.DMA  | #N/A  | 0  | 0 | 0 |
| EGF      | 1950  | 0  | 3 | 0 |
| RBM34    | 23029 | 2  | 0 | 0 |
| ITGB1BP1 | 9270  | 2  | 0 | 0 |
| SPTLC2   | 9517  | 0  | 0 | 0 |
| ACLY     | 47    | 0  | 0 | 0 |
| APP      | 351   | 0  | 0 | 0 |
| RAD51C   | 5889  | 0  | 0 | 0 |
| TSKU     | 25987 | 0  | 0 | 0 |
| SMC1A    | 8243  | 0  | 0 | 2 |
| TMEM2    | 23670 | 0  | 0 | 0 |
| NOS3     | 4846  | 3  | 0 | 0 |
| YME1L1   | 10730 | 0  | 0 | 0 |
| ACAA1    | 30    | 0  | 0 | 0 |
| CSNK1A1  | 1452  | 0  | 0 | 0 |
| HSPA8    | 3312  | 0  | 0 | 0 |
| NFATC4   | 4776  | 0  | 0 | 0 |
| CCNB1    | 891   | 0  | 0 | 0 |
| TBP      | 6908  | 0  | 0 | 0 |

|         |       |   |   |    |
|---------|-------|---|---|----|
| SLC2A6  | 11182 | 0 | 0 | 0  |
| WFS1    | 7466  | 0 | 0 | 0  |
| EZH2    | 2146  | 0 | 0 | -2 |
| UBE3B   | 89910 | 0 | 0 | 0  |
| ICAM3   | 3385  | 0 | 0 | 0  |
| NPDC1   | 56654 | 0 | 0 | 0  |
| ALDH7A1 | 501   | 0 | 0 | 0  |
| BRCA1   | 672   | 0 | 0 | 0  |
| NFATC3  | 4775  | 0 | 0 | -2 |
| PSMD4   | 5710  | 0 | 0 | 0  |
| PCNA    | 5111  | 0 | 0 | 0  |
| PHKG2   | 5261  | 0 | 0 | 0  |
| ETV1    | 2115  | 0 | 0 | 0  |
| POLR2I  | 5438  | 0 | 0 | 0  |
| KDM5B   | 10765 | 0 | 0 | 0  |
| PSMB8   | 5696  | 0 | 0 | 0  |
| AKAP8L  | 26993 | 0 | 0 | 0  |
| COG4    | 25839 | 0 | 0 | 0  |
| MCM3    | 4172  | 0 | 0 | 0  |
| PLEKHJ1 | 55111 | 0 | 0 | 0  |
| HAT1    | 8520  | 0 | 0 | 0  |
| TERT    | 7015  | 0 | 0 | 0  |
| G3BP1   | 10146 | 0 | 0 | 0  |
| SNX13   | 23161 | 0 | 0 | 0  |
| PAK4    | 10298 | 0 | 0 | -3 |



|         |        |    |    |   |
|---------|--------|----|----|---|
| TPD52L2 | 7165   | 0  | 0  | 0 |
| DPH2    | 1802   | 0  | 0  | 0 |
| PIH1D1  | 55011  | 0  | 0  | 0 |
| PRKCQ   | 5588   | 0  | -2 | 0 |
| SNX6    | 58533  | 0  | 0  | 0 |
| EED     | 8726   | 0  | -2 | 0 |
| SHB     | 6461   | 0  | 0  | 2 |
| UTP14A  | 10813  | 0  | 0  | 0 |
| WIPF2   | 147179 | -2 | 0  | 0 |
| NENF    | 29937  | 0  | -2 | 0 |
| TSEN2   | 80746  | 0  | 0  | 0 |
| RPN1    | 6184   | 0  | 0  | 0 |
| SUV39H1 | 6839   | 0  | 0  | 0 |
| C2CD2L  | 9854   | -2 | 0  | 0 |
| LYPLA1  | 10434  | 0  | 0  | 0 |
| BIRC2   | 329    | 0  | 0  | 0 |
| GABPB1  | 2553   | 0  | 0  | 0 |
| MAP2K5  | 5607   | 0  | 0  | 0 |
| POLR2K  | 5440   | 0  | 0  | 0 |
| PTK2B   | 2185   | 0  | 0  | 0 |
| PUF60   | 22827  | 0  | 0  | 0 |
| DHRS7   | 51635  | 0  | 0  | 0 |
| PAF1    | 54623  | 0  | -2 | 0 |
| ARID5B  | 84159  | 2  | 0  | 0 |
| POLR1C  | 9533   | -2 | 0  | 0 |

|         |        |   |    |   |
|---------|--------|---|----|---|
| PAK1    | 5058   | 0 | 0  | 0 |
| RUVBL1  | 8607   | 0 | 0  | 0 |
| AKT1    | 207    | 0 | 0  | 0 |
| CDC42   | 998    | 0 | 0  | 0 |
| IGHMBP2 | 3508   | 0 | 0  | 0 |
| SENP6   | 26054  | 0 | 0  | 0 |
| AD0     | 84890  | 0 | 0  | 0 |
| HSPB1   | 3315   | 0 | 3  | 0 |
| EBP     | 10682  | 0 | 0  | 0 |
| TCTN1   | 79600  | 0 | 0  | 0 |
| AKR7A2  | 8574   | 0 | 0  | 0 |
| CASK    | 8573   | 0 | 0  | 0 |
| PPP2R5E | 5529   | 0 | 0  | 0 |
| RRP8    | 23378  | 0 | 0  | 0 |
| LAMA3   | 3909   | 0 | 0  | 0 |
| PIK3C3  | 5289   | 0 | 0  | 0 |
| BHLHE40 | 8553   | 0 | 0  | 0 |
| CCNE2   | 9134   | 0 | 0  | 0 |
| BDH1    | 622    | 0 | 0  | 0 |
| FEZ2    | 9637   | 0 | -2 | 0 |
| IKBKAP  | 8518   | 0 | 0  | 0 |
| SH3BP5  | 9467   | 0 | 0  | 0 |
| PPP2R5A | 5525   | 0 | 0  | 0 |
| SGCB    | 6443   | 0 | 0  | 0 |
| EML3    | 256364 | 0 | 0  | 0 |

|           |       |       |    |    |   |
|-----------|-------|-------|----|----|---|
| ENOPH1    | 58478 | 0     | 0  | 0  |   |
| BIRC5     | 332   | 0     | 0  | 0  |   |
| CNOT4     | 4850  | 0     | 0  | 0  |   |
| EPRS      | 2058  | 0     | 0  | 0  |   |
| SNAP25    | 6616  | 0     | 0  | 0  |   |
| JMJD6     | 23210 | 0     | 0  | 2  |   |
| PAX8      | 7849  | 0     | 0  | 0  |   |
| CBLB      | 868   | 0     | 0  | 0  |   |
| SLC35F2   | 54733 | 0     | 0  | 0  |   |
| AN010     | 55129 | 0     | 0  | 0  |   |
| PDS5A     | 23244 | 0     | 0  | 0  |   |
| DFFB      | 1677  | -2    | 0  | 0  |   |
| STUB1     | 10273 | 0     | 0  | 0  |   |
| PGAM1     | 5223  | 0     | -2 | 0  |   |
| TGFB3     | 7043  | 0     | 0  | 0  |   |
| BAD       | 572   | 0     | 0  | 0  |   |
| XBP1      | 7494  | 0     | 0  | 0  |   |
| NMT1      | 4836  | 0     | 0  | 0  |   |
| PSMD10    | 5716  | 0     | 0  | -2 |   |
| ARFIP2    | 23647 | 0     | 0  | 0  |   |
| RAB11FIP2 |       | 22841 | 0  | 0  | 0 |
| FPGS      | 2356  | 0     | 0  | 0  |   |
| STAMBP    | 10617 | 0     | 0  | 0  |   |
| PRKX      | 5613  | 0     | 0  | 0  |   |
| RNH1      | 6050  | 0     | 0  | 0  |   |

|         |       |    |   |   |
|---------|-------|----|---|---|
| ATG3    | 64422 | 0  | 0 | 0 |
| FAH     | 2184  | 0  | 0 | 0 |
| NCK1    | 4690  | 0  | 0 | 0 |
| PLP2    | 5355  | 0  | 0 | 0 |
| CFLAR   | 8837  | 0  | 0 | 0 |
| S0X4    | 6659  | 0  | 0 | 0 |
| HEATR1  | 55127 | 0  | 0 | 0 |
| TESK1   | 7016  | 0  | 0 | 0 |
| HN1L    | 90861 | 0  | 0 | 0 |
| WDR7    | 23335 | 0  | 0 | 0 |
| AKAP8   | 10270 | 0  | 0 | 0 |
| RRAGA   | 10670 | 0  | 0 | 0 |
| ELOVL6  | 79071 | 0  | 0 | 0 |
| SLC1A4  | 6509  | 0  | 0 | 0 |
| ACBD3   | 64746 | 0  | 0 | 0 |
| GRWD1   | 83743 | 0  | 0 | 0 |
| PMAIP1  | 5366  | 0  | 0 | 0 |
| STAT1   | 6772  | 0  | 0 | 0 |
| FOXJ3   | 22887 | 0  | 0 | 0 |
| TWF2    | 11344 | 0  | 0 | 0 |
| HDAC6   | 10013 | 0  | 0 | 0 |
| MTERFD1 | 51001 | -2 | 0 | 0 |
| CCND1   | 595   | 0  | 0 | 0 |
| CHIC2   | 26511 | 0  | 0 | 0 |
| PXN     | 5829  | -2 | 0 | 0 |

|          |       |   |    |    |
|----------|-------|---|----|----|
| USP7     | 7874  | 0 | 0  | 0  |
| NOSIP    | 51070 | 0 | 0  | 0  |
| PHKB     | 5257  | 0 | 0  | 2  |
| DLD      | 1738  | 0 | 0  | 0  |
| NFKBIB   | 4793  | 2 | 0  | 0  |
| CASC3    | 22794 | 0 | 0  | 0  |
| IDE      | 3416  | 0 | 0  | 0  |
| CD40     | 958   | 0 | 0  | 0  |
| MLEC     | 9761  | 0 | -3 | 0  |
| GLI2     | 2736  | 0 | 0  | 0  |
| PRPF4    | 9128  | 0 | 0  | 0  |
| MELK     | 9833  | 0 | 0  | 0  |
| USP22    | 23326 | 0 | 0  | 0  |
| DAXX     | 1616  | 0 | 2  | 0  |
| TMED10   | 10972 | 0 | 0  | 0  |
| CHERP    | 10523 | 0 | 0  | 0  |
| SMAD3    | 4088  | 0 | 0  | 0  |
| OXA1L    | 5018  | 0 | 0  | 0  |
| PIK3CA   | 5290  | 0 | 0  | 0  |
| SNX7     | 51375 | 0 | 0  | 0  |
| TRAPPC6A | 79090 | 0 | -2 | -2 |
| ATP2C1   | 27032 | 0 | 0  | -2 |
| CDCA4    | 55038 | 0 | 0  | 0  |
| TBC1D9B  | 23061 | 0 | 0  | 0  |
| USP14    | 9097  | 0 | -3 | 0  |

|          |        |    |   |    |
|----------|--------|----|---|----|
| APPBP2   | 10513  | 0  | 0 | 0  |
| CDC20    | 991    | 0  | 0 | 0  |
| NARFL    | 64428  | 0  | 0 | 0  |
| RPS6     | 6194   | 0  | 0 | 0  |
| DDX42    | 11325  | 0  | 0 | 0  |
| ECH1     | 1891   | 0  | 0 | 0  |
| HDAC2    | 3066   | 0  | 0 | 0  |
| IKBKE    | 9641   | 0  | 0 | 0  |
| CCL2     | 6347   | 0  | 0 | 0  |
| DFFA     | 1676   | 0  | 0 | 0  |
| MRPL19   | 9801   | 0  | 0 | 0  |
| WDT1     | 23038  | 0  | 0 | 0  |
| PLSCR3   | 57048  | 0  | 0 | 0  |
| SUZ12    | 23512  | 0  | 0 | 0  |
| CSNK2A2  | 1459   | 0  | 0 | -2 |
| H2AFV    | 94239  | 0  | 0 | 0  |
| NUSAP1   | 51203  | 0  | 0 | 0  |
| TICAM1   | 148022 | 0  | 0 | 0  |
| FAM69A   | 388650 | -2 | 0 | 0  |
| KIAA0100 | 9703   | 0  | 0 | 0  |
| PAICS    | 10606  | 0  | 0 | 2  |
| SRC      | 6714   | 0  | 0 | 0  |
| BMP4     | 652    | 0  | 0 | 0  |
| CDK2     | 1017   | 2  | 0 | 0  |
| EDN1     | 1906   | 0  | 0 | 0  |

|           |       |    |   |   |
|-----------|-------|----|---|---|
| XP07      | 23039 | 0  | 0 | 0 |
| FAIM      | 55179 | 0  | 0 | 0 |
| KIAA0494  | 9813  | 0  | 0 | 0 |
| PXMP2     | 5827  | 2  | 0 | 0 |
| SQSTM1    | 8878  | 0  | 2 | 0 |
| HIF1A     | 3091  | 0  | 0 | 0 |
| TIMM17B   | 10245 | 0  | 0 | 0 |
| STXBP2    | 6813  | 0  | 0 | 0 |
| WRB       | 7485  | 0  | 0 | 0 |
| ETFB      | 2109  | 2  | 0 | 0 |
| MNAT1     | 4331  | -2 | 0 | 0 |
| CAMSAP2   | 23271 | -2 | 0 | 0 |
| HPRT1     | 3251  | 0  | 0 | 0 |
| ARNT2     | 9915  | 0  | 0 | 0 |
| RRS1      | 23212 | 0  | 0 | 0 |
| ADAT1     | 23536 | 0  | 0 | 0 |
| SPAG7     | 9552  | 0  | 0 | 0 |
| MAPK1IP1L | 93487 | 0  | 0 | 0 |
| SCAND1    | 51282 | 0  | 0 | 2 |
| MFSD10    | 10227 | 0  | 0 | 0 |
| MSH6      | 2956  | 0  | 0 | 0 |
| COPS7A    | 50813 | 0  | 0 | 0 |
| UBE2C     | 11065 | 0  | 0 | 0 |
| FIS1      | 51024 | 0  | 0 | 0 |
| HS2ST1    | 9653  | 0  | 0 | 0 |

|          |        |    |    |    |
|----------|--------|----|----|----|
| NUDT9    | 53343  | 0  | 0  | 0  |
| TXLNA    | 200081 | 0  | 0  | 0  |
| CSRP1    | 1465   | 0  | 0  | 0  |
| DNAJB1   | 3337   | -3 | 4  | 0  |
| METRNL   | 79006  | 0  | 0  | 0  |
| TOPBP1   | 11073  | 0  | 0  | 2  |
| ABCF1    | 23     | 0  | 0  | 0  |
| TCTA     | 6988   | 0  | 0  | 0  |
| LGMN     | 5641   | 0  | 0  | 0  |
| TLK2     | 11011  | 0  | 0  | 0  |
| KIAA1033 | 23325  | 0  | 0  | 0  |
| PTGS2    | 5743   | 0  | 0  | 0  |
| DNAJB6   | 10049  | 0  | 0  | 0  |
| PLA2G4A  | 5321   | 0  | 0  | 0  |
| MAT2A    | 4144   | 0  | 0  | 0  |
| TLR4     | 7099   | 0  | 0  | 0  |
| HMGCS1   | 3157   | 0  | 0  | 0  |
| MBTPS1   | 8720   | -2 | -2 | -2 |
| SPRED2   | 200734 | 0  | 0  | 0  |
| ZNF274   | 10782  | 0  | 0  | 0  |
| CLIC4    | 25932  | 0  | -3 | 0  |
| MAP7     | 9053   | 0  | 0  | 0  |
| CHAC1    | 79094  | 0  | 2  | 0  |
| EIF4G1   | 1981   | 0  | 0  | 0  |
| BTK      | 695    | 0  | 0  | 0  |



|          |       |    |    |   |
|----------|-------|----|----|---|
| GNAS     | 2778  | 0  | 0  | 0 |
| MYL9     | 10398 | 0  | 0  | 0 |
| TEX10    | 54881 | 0  | 0  | 0 |
| PSMD2    | 5708  | 0  | 0  | 0 |
| ZNF586   | 54807 | 0  | 0  | 0 |
| CLTC     | 1213  | 0  | 0  | 0 |
| IKZF1    | 10320 | 0  | 0  | 0 |
| APBB2    | 323   | 0  | 0  | 0 |
| HSD17B10 | 3028  | 0  | 0  | 0 |
| RNF167   | 26001 | 0  | 0  | 0 |
| STX1A    | 6804  | 0  | 0  | 0 |
| ALDOA    | 226   | 0  | 0  | 0 |
| EPHA3    | 2042  | 0  | 0  | 0 |
| STAT5B   | 6777  | 0  | -2 | 0 |
| TXNDC9   | 10190 | -2 | 0  | 2 |
| CCNA2    | 890   | 0  | 0  | 0 |
| VGLL4    | 9686  | 0  | 0  | 0 |
| CASP10   | 843   | 0  | 0  | 0 |
| SDHB     | 6390  | 0  | 0  | 0 |
| ETS1     | 2113  | 0  | 2  | 0 |
| YTHDF1   | 54915 | 0  | -2 | 0 |
| FOXO4    | 4303  | 0  | 0  | 0 |
| LSM5     | 23658 | 0  | 0  | 0 |
| TOMM34   | 10953 | 0  | 0  | 2 |
| ZMYM2    | 7750  | 0  | 0  | 0 |

|          |       |    |    |    |
|----------|-------|----|----|----|
| CHMP6    | 79643 | 0  | 0  | 2  |
| KIAA0907 | 22889 | 0  | 0  | 0  |
| CASP7    | 840   | 0  | 2  | 0  |
| HK1      | 3098  | 0  | 0  | 0  |
| PAPD7    | 11044 | 0  | 0  | 0  |
| PIGB     | 9488  | 0  | 0  | 0  |
| CHEK2    | 11200 | 0  | 0  | 0  |
| PLOD3    | 8985  | 0  | -2 | 0  |
| ACD      | 65057 | 0  | 0  | 0  |
| TRAK2    | 66008 | 0  | 0  | 0  |
| SUPV3L1  | 6832  | 0  | 0  | 0  |
| VAPB     | 9217  | -2 | 0  | -2 |
| GPATCH8  | 23131 | 0  | 0  | 0  |
| HSPD1    | 3329  | 0  | 4  | 0  |
| BUB1B    | 701   | 0  | 0  | 0  |
| TGFBR2   | 7048  | 0  | 0  | 0  |
| MRPL12   | 6182  | 0  | 0  | 0  |
| NOTCH1   | 4851  | 0  | 0  | 0  |
| PNP      | 4860  | 0  | 0  | 0  |
| SHC1     | 6464  | 0  | 2  | 0  |
| ARPP19   | 10776 | 0  | 0  | 0  |
| CEBPA    | 1050  | 0  | 0  | 0  |
| PSMF1    | 9491  | 0  | 0  | 0  |
| RTN2     | 6253  | 0  | 0  | 0  |
| NPEPL1   | 79716 | 0  | 0  | 0  |

|            |        |   |    |    |   |
|------------|--------|---|----|----|---|
| USP1       | 7398   | 0 | 0  | 0  |   |
| RPA1       | 6117   | 0 | 0  | 0  |   |
| SIRT3      | 23410  | 0 | 0  | 0  |   |
| KLHDC2     | 23588  | 0 | 0  | 0  |   |
| UBQLN2     | 29978  | 0 | 0  | 0  |   |
| DMTF1      | 9988   | 0 | 0  | 0  |   |
| SCARB1     | 949    | 0 | 0  | 0  |   |
| CLPX       | 10845  | 0 | 0  | 0  |   |
| TPM1       | 7168   | 0 | 0  | 0  |   |
| TM9SF2     | 9375   | 0 | 0  | -2 |   |
| TXNL4B     | 54957  | 0 | 0  | 0  |   |
| ATF6       | 22926  | 0 | 0  | 0  |   |
| PRR15L     | 79170  | 0 | -2 | 0  |   |
| NUP88      | 4927   | 0 | 0  | 0  |   |
| ST6GALNAC2 | 10610  | 0 | 0  | 0  | 0 |
| ADH5       | 128    | 0 | 0  | 3  |   |
| FUT1       | 2523   | 0 | 0  | 0  |   |
| GOLT1B     | 51026  | 0 | 0  | 0  |   |
| PRUNE      | 58497  | 0 | 0  | 0  |   |
| PPOX       | 5498   | 0 | 0  | 0  |   |
| SYPL1      | 6856   | 0 | 0  | 0  |   |
| CANT1      | 124583 | 0 | 0  | 0  |   |
| ZNF451     | 26036  | 0 | 0  | 0  |   |
| HOMER2     | 9455   | 0 | 0  | 0  |   |
| RALB       | 5899   | 0 | 0  | 0  |   |

|           |       |      |    |    |   |
|-----------|-------|------|----|----|---|
| CLTB      | 1212  | 0    | 0  | 0  |   |
| TRIM13    | 10206 | -2   | 0  | -2 |   |
| FBX07     | 25793 | 0    | 0  | 0  |   |
| PHKA1     | 5255  | 0    | 0  | 0  |   |
| CYCS      | 54205 | 0    | -2 | 0  |   |
| PPARD     | 5467  | 0    | 0  | 2  |   |
| ENOSF1    | 55556 | 0    | 0  | 0  |   |
| MAP4K4    | 9448  | 0    | 0  | 0  |   |
| PAN2      | 9924  | 0    | 0  | 0  |   |
| STAT3     | 6774  | 0    | 0  | 0  |   |
| LIG1      | 3978  | 0    | 0  | 0  |   |
| PPIC      | 5480  | 0    | 0  | 0  |   |
| EIF5      | 1983  | -2   | 0  | 0  |   |
| GNB5      | 10681 | 0    | 0  | 0  |   |
| GNAI1     | 2770  | 0    | 0  | 0  |   |
| INSIG1    | 3638  | 0    | 0  | 0  |   |
| DNMT3A    | 1788  | 0    | 0  | 0  |   |
| TM9SF3    | 56889 | 0    | 0  | 0  |   |
| CCDC86    | 79080 | 0    | 0  | 0  |   |
| HIST2H2BE |       | 8349 | 0  | 0  | 0 |
| S100A4    | 6275  | 0    | 0  | 0  |   |
| SLC25A14  | 9016  | 0    | 0  | 0  |   |
| KTN1      | 3895  | 0    | 0  | 0  |   |
| TBXA2R    | 6915  | 3    | 0  | 0  |   |
| ARHGAP1   | 392   | 0    | 0  | 0  |   |

|          |        |   |   |   |
|----------|--------|---|---|---|
| FBX011   | 80204  | 0 | 0 | 0 |
| HERPUD1  | 9709   | 0 | 0 | 0 |
| LPAR2    | 9170   | 0 | 0 | 0 |
| COASY    | 80347  | 0 | 0 | 0 |
| RPL39L   | 116832 | 0 | 0 | 0 |
| BPHL     | 670    | 0 | 0 | 0 |
| RASA1    | 5921   | 0 | 0 | 0 |
| ATMIN    | 23300  | 0 | 0 | 0 |
| MAPKAPK3 | 7867   | 0 | 0 | 0 |
| CASP3    | 836    | 0 | 0 | 0 |
| MB0AT7   | 79143  | 0 | 0 | 0 |
| PNKP     | 11284  | 0 | 2 | 0 |
| PSME2    | 5721   | 0 | 0 | 0 |
| NISCH    | 11188  | 0 | 0 | 0 |
| SLC35A3  | 23443  | 0 | 0 | 0 |
| CPSF4    | 10898  | 0 | 0 | 0 |
| LSR      | 51599  | 0 | 0 | 0 |
| COPB2    | 9276   | 0 | 0 | 0 |
| MEF2C    | 4208   | 0 | 0 | 0 |
| GADD45A  | 1647   | 0 | 0 | 0 |
| KDM5A    | 5927   | 0 | 0 | 0 |
| FAM63A   | 55793  | 0 | 0 | 0 |
| SMNDC1   | 10285  | 0 | 0 | 0 |
| NUDCD3   | 23386  | 0 | 0 | 0 |
| RAB4A    | 5867   | 0 | 0 | 0 |

|          |       |    |    |   |
|----------|-------|----|----|---|
| FGFR2    | 2263  | 0  | 0  | 0 |
| IFRD2    | 7866  | 2  | 0  | 0 |
| BACE2    | 25825 | 0  | 0  | 0 |
| HMGCR    | 3156  | 0  | -2 | 0 |
| LYN      | 4067  | 0  | 0  | 0 |
| SLC35B1  | 10237 | 0  | 0  | 0 |
| ISOC1    | 51015 | 0  | 0  | 0 |
| TIMP2    | 7077  | 0  | 0  | 0 |
| DUSP3    | 1845  | 0  | 0  | 0 |
| LSM6     | 11157 | 0  | 0  | 0 |
| CALM3    | 808   | 0  | 0  | 0 |
| MOK      | 5891  | 0  | 0  | 0 |
| PPP1R13B | 23368 | 0  | 0  | 0 |
| SACM1L   | 22908 | -2 | 0  | 0 |
| DNAJB2   | 3300  | 0  | 0  | 0 |
| TCERG1   | 10915 | 0  | 0  | 0 |
| CERK     | 64781 | 0  | 0  | 0 |
| KIAA0196 | 9897  | 0  | 0  | 0 |
| DNM1     | 1759  | 0  | 0  | 0 |
| LAP3     | 51056 | 0  | 0  | 0 |
| DDIT4    | 54541 | 0  | 0  | 0 |
| MAPKAPK5 | 8550  | 0  | 0  | 0 |
| ALAS1    | 211   | 0  | 4  | 2 |
| HDGFRP3  | 50810 | 0  | 0  | 2 |
| PAFAH1B1 | 5048  | 0  | -2 | 0 |

|           |       |   |   |   |
|-----------|-------|---|---|---|
| PRKCH     | 5583  | 0 | 0 | 0 |
| PSRC1     | 84722 | 0 | 0 | 0 |
| RAB21     | 23011 | 0 | 0 | 0 |
| ER01L     | 30001 | 0 | 0 | 0 |
| PSIP1     | 11168 | 0 | 0 | 0 |
| APOE      | 348   | 0 | 0 | 0 |
| CREB1     | 1385  | 0 | 0 | 0 |
| MBNL2     | 10150 | 0 | 0 | 0 |
| RBM15B    | 29890 | 0 | 0 | 0 |
| PACSIN3   | 29763 | 0 | 0 | 0 |
| TOMM70A   | 9868  | 0 | 0 | 0 |
| CBR1      | 873   | 0 | 0 | 0 |
| MTA1      | 9112  | 0 | 0 | 0 |
| MACF1     | 23499 | 0 | 0 | 0 |
| PRKCD     | 5580  | 0 | 0 | 0 |
| CCNA1     | 8900  | 0 | 0 | 0 |
| PIK3R4    | 30849 | 0 | 0 | 0 |
| CSNK1E    | 1454  | 0 | 0 | 0 |
| HIST1H2BK | 85236 | 0 | 0 | 0 |
| JUN       | 3725  | 0 | 0 | 0 |
| PCCB      | 5096  | 0 | 0 | 0 |
| STAP2     | 55620 | 0 | 0 | 0 |
| TMEM50A   | 23585 | 0 | 0 | 0 |
| PMM2      | 5373  | 0 | 0 | 0 |
| SCCPDH    | 51097 | 2 | 0 | 0 |

|          |        |   |    |   |
|----------|--------|---|----|---|
| HSD17B11 | 51170  | 0 | 0  | 0 |
| TSC22D3  | 1831   | 0 | 0  | 0 |
| FBXL12   | 54850  | 0 | 0  | 0 |
| TFAP2A   | 7020   | 0 | 0  | 0 |
| WDR61    | 80349  | 0 | 0  | 0 |
| ZNF395   | 55893  | 0 | 0  | 0 |
| FAS      | 355    | 0 | 0  | 0 |
| VPS72    | 6944   | 0 | 0  | 0 |
| CENPE    | 1062   | 0 | 0  | 0 |
| CLSTN1   | 22883  | 0 | 0  | 0 |
| CREG1    | 8804   | 0 | 0  | 0 |
| MAPK9    | 5601   | 0 | 0  | 0 |
| PRR7     | 80758  | 0 | 0  | 0 |
| SKP1     | 6500   | 0 | 0  | 0 |
| POP4     | 10775  | 0 | 0  | 0 |
| TMEM110  | 375346 | 0 | 0  | 0 |
| NFE2L2   | 4780   | 0 | 0  | 0 |
| ZNF589   | 51385  | 0 | 0  | 0 |
| BAX      | 581    | 0 | 0  | 0 |
| BLCAP    | 10904  | 0 | 0  | 0 |
| CNDP2    | 55748  | 0 | 0  | 0 |
| FAM20B   | 9917   | 0 | 0  | 0 |
| PROS1    | 5627   | 0 | 0  | 0 |
| TNIP1    | 10318  | 0 | 0  | 0 |
| CRKL     | 1399   | 0 | -2 | 0 |



|        |       |   |    |    |
|--------|-------|---|----|----|
| P4HTM  | 54681 | 0 | 0  | 0  |
| REEP5  | 7905  | 0 | 0  | 0  |
| ZNF318 | 24149 | 0 | 0  | 0  |
| BZW2   | 28969 | 0 | 0  | 0  |
| FDFT1  | 2222  | 0 | 0  | 2  |
| CGRRF1 | 10668 | 0 | 0  | 0  |
| TRAP1  | 10131 | 2 | -3 | 0  |
| AMDHD2 | 51005 | 0 | 0  | 0  |
| GTF2A2 | 2958  | 0 | 0  | 0  |
| PEX11A | 8800  | 0 | 0  | 0  |
| PSMD9  | 5715  | 0 | 0  | 0  |
| GFOD1  | 54438 | 0 | 0  | 0  |
| MTFR1  | 9650  | 0 | 0  | 0  |
| PECR   | 55825 | 0 | 0  | 0  |
| UBE2A  | 7319  | 0 | 0  | 0  |
| NIT1   | 4817  | 0 | 0  | 0  |
| SOCS2  | 8835  | 0 | 0  | 0  |
| SYNGR3 | 9143  | 0 | 0  | 0  |
| ZDHHC6 | 64429 | 0 | 0  | 0  |
| ITGAE  | 3682  | 0 | 0  | 0  |
| NFKB2  | 4791  | 0 | 0  | 0  |
| STK25  | 10494 | 0 | 0  | -2 |
| TMEM5  | 10329 | 0 | 0  | 0  |
| ABCF3  | 55324 | 0 | 0  | 0  |
| ATP5S  | 27109 | 0 | 0  | 0  |

|          |       |   |    |   |
|----------|-------|---|----|---|
| FCH01    | 23149 | 0 | 0  | 0 |
| NGRN     | 51335 | 0 | 0  | 0 |
| H0XA5    | 3202  | 0 | -2 | 0 |
| OXSRI    | 9943  | 0 | 0  | 0 |
| GRN      | 2896  | 0 | 0  | 0 |
| SMARCC1  | 6599  | 0 | 0  | 0 |
| NUP85    | 79902 | 0 | 0  | 0 |
| PAK6     | 56924 | 0 | 0  | 0 |
| GHR      | 2690  | 0 | 0  | 0 |
| GTPBP8   | 29083 | 0 | 0  | 0 |
| GL0D4    | 51031 | 0 | 0  | 0 |
| PTK2     | 5747  | 0 | 0  | 0 |
| CDK4     | 1019  | 0 | 0  | 0 |
| EPN2     | 22905 | 0 | 0  | 0 |
| CCDC90A  | 63933 | 0 | 0  | 0 |
| IL4R     | 3566  | 0 | 0  | 0 |
| KIAA0528 | 9847  | 0 | 0  | 0 |
| PRKAG2   | 51422 | 0 | 0  | 0 |
| KIT      | 3815  | 0 | 0  | 0 |
| MRPS16   | 51021 | 0 | 0  | 0 |
| PTPRC    | 5788  | 0 | 0  | 0 |
| RPS5     | 6193  | 0 | 0  | 0 |
| N0L3     | 8996  | 0 | 0  | 0 |
| PSMG1    | 8624  | 0 | 0  | 0 |
| NR1H2    | 7376  | 0 | 0  | 0 |

|          |       |   |   |   |
|----------|-------|---|---|---|
| TMEM97   | 27346 | 0 | 0 | 0 |
| LRRRC41  | 10489 | 0 | 0 | 0 |
| PLS1     | 5357  | 0 | 0 | 0 |
| DUSP22   | 56940 | 0 | 0 | 0 |
| KIAA1279 | 26128 | 0 | 0 | 0 |
| RPS6KA1  | 6195  | 0 | 0 | 0 |
| TCEAL4   | 79921 | 0 | 0 | 0 |
| DCK      | 1633  | 0 | 0 | 0 |
| NUP133   | 55746 | 0 | 0 | 2 |
| NUP62    | 23636 | 0 | 0 | 0 |
| TRIM2    | 23321 | 2 | 0 | 0 |
| SNCA     | 6622  | 0 | 0 | 0 |
| SPTAN1   | 6709  | 0 | 0 | 0 |
| MALT1    | 10892 | 0 | 0 | 0 |
| VPS28    | 51160 | 0 | 0 | 0 |
| LRRRC16A | 55604 | 0 | 0 | 0 |
| YKT6     | 10652 | 0 | 0 | 0 |
| CHP      | 11261 | 0 | 0 | 0 |
| KIF2C    | 11004 | 0 | 0 | 0 |
| NNT      | 23530 | 0 | 0 | 0 |
| NR2F6    | 2063  | 0 | 0 | 0 |
| COL1A1   | 1277  | 0 | 0 | 0 |
| EXOSC4   | 54512 | 0 | 0 | 0 |
| CDC25A   | 993   | 0 | 0 | 0 |
| PDLIM1   | 9124  | 0 | 0 | 0 |

|          |       |    |    |   |
|----------|-------|----|----|---|
| CRELD2   | 79174 | 0  | 0  | 0 |
| TP53     | 7157  | 0  | 0  | 2 |
| IQGAP1   | 8826  | 0  | 0  | 0 |
| RRP12    | 23223 | 0  | 0  | 0 |
| ACAT2    | 39    | 3  | 0  | 2 |
| EGR1     | 1958  | 0  | 0  | 0 |
| MUC1     | 4582  | 0  | 0  | 0 |
| THAP11   | 57215 | 0  | 0  | 0 |
| AURKB    | 9212  | 0  | 0  | 0 |
| CEBPD    | 1052  | 2  | 0  | 0 |
| HSPA4    | 3308  | 0  | 0  | 0 |
| MAST2    | 23139 | 0  | 0  | 0 |
| DHDDS    | 79947 | 0  | 0  | 0 |
| TOP2A    | 7153  | 0  | 0  | 0 |
| GADD45B  | 4616  | 0  | 2  | 0 |
| NCK2     | 8440  | 0  | 0  | 0 |
| AURKA    | 6790  | 0  | -2 | 0 |
| KIAA0355 | 9710  | 0  | 0  | 0 |
| B3GNT1   | 11041 | 0  | 0  | 0 |
| DYNLT3   | 6990  | 0  | 0  | 0 |
| CDK5R1   | 8851  | 0  | 0  | 0 |
| CHMP4A   | 29082 | 0  | 0  | 0 |
| IP013    | 9670  | -2 | 0  | 0 |
| SCP2     | 6342  | 0  | 0  | 0 |
| ITFG1    | 81533 | 0  | 0  | 0 |

|          |       |    |    |   |
|----------|-------|----|----|---|
| RAD9A    | 5883  | 0  | 0  | 0 |
| DRAP1    | 10589 | 0  | 0  | 0 |
| SPP1     | 6696  | 0  | 2  | 0 |
| HYOU1    | 10525 | 0  | 0  | 0 |
| PCMT1    | 5110  | 0  | 0  | 0 |
| FOS      | 2353  | 0  | 0  | 0 |
| FYN      | 2534  | 0  | 0  | 0 |
| MCOLN1   | 57192 | -2 | 0  | 0 |
| MYC      | 4609  | 0  | 0  | 0 |
| ID2      | 3398  | 0  | 0  | 0 |
| POLB     | 5423  | 0  | 0  | 0 |
| CETN3    | 1070  | 0  | 0  | 0 |
| KCNK1    | 3775  | 0  | 0  | 0 |
| AXIN1    | 8312  | 0  | 0  | 0 |
| SMC4     | 10051 | 0  | 0  | 0 |
| RAI14    | 26064 | 0  | 0  | 0 |
| SMARCD2  | 6603  | 0  | 0  | 0 |
| DNAJC15  | 29103 | 0  | 0  | 0 |
| MPZL1    | 9019  | 0  | 0  | 0 |
| HOXA10   | 3206  | 0  | 0  | 0 |
| NRAS     | 4893  | 0  | 0  | 0 |
| CASP2    | 835   | 0  | -2 | 0 |
| EBNA1BP2 | 10969 | 2  | 0  | 2 |
| CTNND1   | 1500  | 0  | 0  | 0 |
| TATDN2   | 9797  | -2 | 0  | 0 |

|          |       |    |    |    |
|----------|-------|----|----|----|
| LRPAP1   | 4043  | 0  | 0  | -2 |
| ZNF131   | 7690  | 0  | 0  | 0  |
| BNIP3L   | 665   | 0  | 0  | 0  |
| H00K2    | 29911 | 0  | 0  | 0  |
| ERBB2    | 2064  | 0  | 0  | 0  |
| TBPL1    | 9519  | 0  | 0  | 0  |
| INTS3    | 65123 | 0  | 0  | 0  |
| RAE1     | 8480  | 0  | 2  | 0  |
| CDK1     | 983   | 0  | 0  | 0  |
| RFNG     | 5986  | 0  | 0  | 0  |
| MICALL1  | 85377 | 0  | 0  | 0  |
| SLC35A1  | 10559 | 0  | -3 | 0  |
| KLHL21   | 9903  | -2 | 0  | 0  |
| NIPSNAP1 | 8508  | 0  | 0  | 0  |
| BCL7B    | 9275  | 0  | 0  | 0  |
| TLE1     | 7088  | 0  | 0  | 0  |
| FZD7     | 8324  | 0  | 0  | 0  |
| TIMELESS | 8914  | 0  | 0  | 0  |
| COG2     | 22796 | 0  | 0  | 0  |
| DHX29    | 54505 | -4 | 0  | 0  |
| MMP2     | 4313  | 0  | 0  | 0  |
| MRPS2    | 51116 | 0  | 0  | 0  |
| KCTD5    | 54442 | 0  | 0  | 0  |
| TCEA2    | 6919  | 0  | 0  | 0  |
| CNPY3    | 10695 | 0  | 0  | 0  |

|          |       |   |    |   |
|----------|-------|---|----|---|
| FHL2     | 2274  | 0 | 2  | 0 |
| ADAM10   | 102   | 0 | 0  | 3 |
| FKBP4    | 2288  | 0 | 2  | 0 |
| CD58     | 965   | 0 | 0  | 0 |
| KAT6A    | 7994  | 0 | 0  | 0 |
| CDK7     | 1022  | 0 | 0  | 0 |
| KIF5C    | 3800  | 0 | 0  | 0 |
| HMG20B   | 10362 | 0 | -2 | 0 |
| MAP3K4   | 4216  | 0 | 0  | 0 |
| PIN1     | 5300  | 0 | 0  | 0 |
| ZFP36    | 7538  | 0 | 0  | 0 |
| INPP1    | 3628  | 0 | 0  | 0 |
| LAGE3    | 8270  | 0 | 0  | 0 |
| RAC2     | 5880  | 0 | 0  | 0 |
| TNFRSF21 | 27242 | 0 | 0  | 0 |
| HMOX1    | 3162  | 0 | 6  | 2 |
| KIF14    | 9928  | 0 | 0  | 0 |
| COL4A1   | 1282  | 2 | 0  | 0 |
| DUSP6    | 1848  | 0 | 0  | 0 |
| CYB561   | 1534  | 0 | 0  | 0 |
| EPB41L2  | 2037  | 0 | 0  | 0 |
| GNAI2    | 2771  | 0 | 0  | 0 |
| HTRA1    | 5654  | 0 | 0  | 0 |
| TSTA3    | 7264  | 0 | 0  | 0 |
| WASF3    | 10810 | 0 | 0  | 0 |

|         |       |   |    |   |
|---------|-------|---|----|---|
| DNMT1   | 1786  | 0 | 0  | 0 |
| TSPAN6  | 7105  | 0 | 0  | 0 |
| FBX021  | 23014 | 0 | 0  | 0 |
| RAB27A  | 5873  | 0 | 0  | 0 |
| DDR1    | 780   | 0 | 0  | 0 |
| PPP2R3C | 55012 | 0 | 0  | 0 |
| ADRB2   | 154   | 0 | -2 | 0 |
| LPGAT1  | 9926  | 0 | 0  | 0 |
| DUSP11  | 8446  | 0 | 0  | 0 |
| GRB10   | 2887  | 2 | 0  | 0 |
| MMP1    | 4312  | 0 | 3  | 2 |
| TP53BP2 | 7159  | 0 | 0  | 0 |
| CDKN1A  | 1026  | 0 | -2 | 0 |
| ZW10    | 9183  | 0 | 0  | 0 |
| COR01A  | 11151 | 0 | 0  | 0 |
| TJP1    | 7082  | 0 | 0  | 0 |
| ABCB6   | 10058 | 0 | 0  | 0 |
| XPNPEP1 | 7511  | 0 | 0  | 0 |
| MAMLD1  | 10046 | 0 | 0  | 0 |
| MTHFD2  | 10797 | 0 | 0  | 0 |
| DSG2    | 1829  | 0 | 0  | 0 |
| PRAF2   | 11230 | 0 | 0  | 0 |
| DNTTIP2 | 30836 | 0 | 0  | 0 |
| SLC27A3 | 11000 | 0 | 2  | 0 |
| CD97    | 976   | 2 | 0  | 0 |



|         |       |   |    |    |
|---------|-------|---|----|----|
| HTATSF1 | 27336 | 0 | -2 | -2 |
| IL13RA1 | 3597  | 2 | 0  | 0  |
| NCAPD2  | 9918  | 0 | 0  | 0  |
| AGL     | 178   | 0 | 0  | 0  |
| TMEM109 | 79073 | 0 | 0  | 0  |
| CDC25B  | 994   | 0 | 0  | 0  |
| ICAM1   | 3383  | 0 | 0  | 0  |
| GATA3   | 2625  | 0 | 0  | 0  |
| NUP93   | 9688  | 0 | 0  | 2  |
| PLA2G15 | 23659 | 0 | 0  | -2 |
| RPA3    | 6119  | 0 | 0  | 2  |
| PIP4K2B | 8396  | 0 | -2 | 0  |
| TES     | 26136 | 0 | 0  | 0  |
| MYCBP2  | 23077 | 0 | 0  | 0  |
| SPR     | 6697  | 0 | 0  | 0  |
| PGRMC1  | 10857 | 0 | 0  | 0  |
| RELB    | 5971  | 0 | 0  | 0  |
| AARS    | 16    | 0 | 0  | 0  |
| EPHB2   | 2048  | 0 | 0  | 0  |
| GPC1    | 2817  | 0 | 0  | 0  |
| RPIA    | 22934 | 0 | -2 | 0  |
| ELAC2   | 60528 | 0 | 0  | 0  |
| GPR56   | 9289  | 0 | 0  | 0  |
| NVL     | 4931  | 0 | 0  | 0  |
| PLSCR1  | 5359  | 0 | 0  | 0  |

|         |       |   |    |   |
|---------|-------|---|----|---|
| CHEK1   | 1111  | 0 | 0  | 2 |
| CTSL1   | 1514  | 0 | 0  | 0 |
| CTSD    | 1509  | 0 | 2  | 0 |
| ME2     | 4200  | 0 | 0  | 0 |
| ARHGEF2 | 9181  | 0 | 0  | 0 |
| PDGFA   | 5154  | 0 | 0  | 0 |
| ILK     | 3611  | 0 | 0  | 0 |
| WDR67   | 93594 | 0 | 0  | 0 |
| NFIL3   | 4783  | 0 | 0  | 0 |
| RFC2    | 5982  | 0 | 0  | 0 |
| ARL4C   | 10123 | 0 | 0  | 0 |
| TIMM9   | 26520 | 0 | 0  | 0 |
| CPNE3   | 8895  | 0 | 0  | 0 |
| ORC1    | 4998  | 0 | 0  | 0 |
| C5      | 727   | 0 | 0  | 0 |
| PARP2   | 10038 | 0 | 0  | 0 |
| FASTKD5 | 60493 | 0 | 0  | 0 |
| SCRN1   | 9805  | 0 | 0  | 0 |
| MAN2B1  | 4125  | 0 | 0  | 0 |
| PTPLAD1 | 51495 | 0 | -2 | 0 |
| MSRA    | 4482  | 0 | 0  | 0 |
| NFKBIA  | 4792  | 0 | 0  | 0 |
| DCTD    | 1635  | 0 | 4  | 0 |
| SYNE2   | 23224 | 0 | 0  | 0 |
| MBNL1   | 4154  | 0 | 0  | 0 |

|         |       |   |   |   |
|---------|-------|---|---|---|
| UBE3C   | 9690  | 0 | 0 | 0 |
| CCDC92  | 80212 | 0 | 0 | 0 |
| MYCBP   | 26292 | 0 | 0 | 0 |
| CXCL2   | 2920  | 0 | 0 | 0 |
| PTPN1   | 5770  | 0 | 0 | 0 |
| BRP44   | 25874 | 0 | 0 | 0 |
| TIMM22  | 29928 | 0 | 0 | 0 |
| ATF5    | 22809 | 0 | 0 | 0 |
| ECD     | 11319 | 0 | 0 | 0 |
| CIRBP   | 1153  | 0 | 0 | 0 |
| NSDHL   | 50814 | 0 | 0 | 0 |
| ADI1    | 55256 | 0 | 0 | 0 |
| NFKBIE  | 4794  | 0 | 0 | 0 |
| ADCK3   | 56997 | 0 | 0 | 0 |
| PRSS23  | 11098 | 0 | 0 | 2 |
| CCNH    | 902   | 0 | 2 | 0 |
| GDPD5   | 81544 | 0 | 0 | 0 |
| P4HA2   | 8974  | 0 | 0 | 0 |
| TARBP1  | 6894  | 0 | 0 | 0 |
| ATP6V0B | 533   | 0 | 0 | 0 |
| RBKS    | 64080 | 0 | 0 | 0 |
| CAPN1   | 823   | 0 | 0 | 0 |
| KDM3A   | 55818 | 0 | 0 | 0 |
| BID     | 637   | 0 | 0 | 0 |
| STXBP1  | 6812  | 0 | 0 | 0 |

|          |       |    |    |   |
|----------|-------|----|----|---|
| ITGB5    | 3693  | 0  | 0  | 0 |
| MTF2     | 22823 | 0  | 0  | 0 |
| HLA.DRA  | #N/A  | 0  | 0  | 0 |
| SLC11A2  | 4891  | 0  | 0  | 0 |
| PDIA5    | 10954 | 0  | 0  | 0 |
| PIK3C2B  | 5287  | 0  | -2 | 0 |
| RAP1GAP  | 5909  | 0  | 0  | 0 |
| SLC25A46 | 91137 | 0  | 0  | 0 |
| CDK19    | 23097 | -2 | -3 | 0 |
| NOLC1    | 9221  | 0  | 0  | 0 |
| CAT      | 847   | 0  | 0  | 0 |
| KIAA0753 | 9851  | 0  | 0  | 0 |
| DUSP14   | 11072 | 0  | 0  | 0 |
| KAT6B    | 23522 | 0  | 0  | 0 |
| CHN1     | 1123  | 0  | 0  | 0 |
| HMGA2    | 8091  | 0  | 0  | 0 |
| IGFBP3   | 3486  | 0  | 0  | 0 |
| MAPK13   | 5603  | 0  | 0  | 0 |
| TRIB1    | 10221 | 0  | 0  | 0 |
| UFM1     | 51569 | 0  | 0  | 0 |
| GNA15    | 2769  | 0  | 0  | 0 |
| TP53BP1  | 7158  | 0  | 0  | 0 |
| FRS2     | 10818 | -2 | 0  | 0 |
| IARS2    | 55699 | 0  | 0  | 0 |
| BECN1    | 8678  | 0  | 0  | 0 |

|         |       |    |    |   |
|---------|-------|----|----|---|
| GATA2   | 2624  | 0  | 0  | 0 |
| KDELR2  | 11014 | 0  | 0  | 0 |
| RALGDS  | 5900  | 0  | 0  | 0 |
| ELAVL1  | 1994  | 0  | 0  | 0 |
| NRIP1   | 8204  | -2 | 0  | 0 |
| CCNB2   | 9133  | 0  | 0  | 0 |
| IFNAR1  | 3454  | 0  | 0  | 0 |
| MIF     | 4282  | 0  | 0  | 0 |
| RNPS1   | 10921 | 0  | 0  | 0 |
| DAG1    | 1605  | 0  | 0  | 0 |
| SATB1   | 6304  | 0  | 0  | 0 |
| ARID4B  | 51742 | 0  | 0  | 0 |
| IGF2BP2 | 10644 | 0  | 0  | 0 |
| GSTZ1   | 2954  | 2  | -2 | 0 |
| IGF2R   | 3482  | 0  | 0  | 0 |
| SESN1   | 27244 | 0  | 0  | 0 |
| TIPARP  | 25976 | 0  | -2 | 0 |
| CRTAP   | 10491 | -2 | 0  | 0 |
| SPEN    | 23013 | 0  | 0  | 0 |
| GMNN    | 51053 | 0  | 0  | 0 |
| PFKL    | 5211  | 0  | 0  | 0 |
| CYTH1   | 9267  | 0  | -2 | 0 |
| PDHX    | 8050  | 0  | 0  | 0 |
| DENND2D | 79961 | 0  | -3 | 0 |
| PRCP    | 5547  | 0  | 0  | 0 |

|          |       |    |    |   |
|----------|-------|----|----|---|
| CTTN     | 2017  | -2 | 0  | 0 |
| SMARCA4  | 6597  | 0  | 0  | 0 |
| PYGL     | 5836  | 0  | 0  | 0 |
| UBR7     | 55148 | 0  | 0  | 0 |
| GRB7     | 2886  | 0  | 0  | 0 |
| RPA2     | 6118  | 0  | 0  | 0 |
| CD44     | 960   | 0  | 0  | 0 |
| ERBB3    | 2065  | 0  | 0  | 0 |
| GTF2E2   | 2961  | 0  | 0  | 0 |
| VAV3     | 10451 | 0  | 0  | 0 |
| ABHD6    | 57406 | 0  | 0  | 0 |
| ANXA7    | 310   | 0  | 0  | 0 |
| MAPKAPK2 | 9261  | 0  | 2  | 0 |
| TXNRD1   | 7296  | 0  | 0  | 0 |
| CAB39    | 51719 | 0  | 0  | 0 |
| FZD1     | 8321  | 0  | 0  | 0 |
| CRYZ     | 1429  | 0  | 2  | 0 |
| TIAM1    | 7074  | 0  | 0  | 0 |
| DNM1L    | 10059 | 0  | 0  | 0 |
| GAA      | 2548  | 0  | -3 | 0 |
| DERA     | 51071 | 0  | 0  | 0 |
| SKIV2L   | 6499  | 0  | 0  | 0 |
| BLMH     | 642   | 0  | 0  | 0 |
| PTPRK    | 5796  | 0  | 0  | 0 |
| HERC6    | 55008 | 0  | 0  | 0 |

|         |       |   |    |   |
|---------|-------|---|----|---|
| RRP1B   | 23076 | 0 | 0  | 0 |
| MKNK1   | 8569  | 0 | 0  | 0 |
| TSPAN3  | 10099 | 0 | 0  | 0 |
| ACOT9   | 23597 | 0 | 0  | 2 |
| PIK3R3  | 8503  | 0 | 0  | 0 |
| KEAP1   | 9817  | 0 | 2  | 0 |
| ST3GAL5 | 8869  | 0 | 0  | 0 |
| CTNNAL1 | 8727  | 0 | 0  | 0 |
| TFDP1   | 7027  | 0 | 0  | 0 |
| ABHD4   | 63874 | 0 | 0  | 0 |
| SMC3    | 9126  | 0 | 0  | 2 |
| INPP4B  | 8821  | 0 | 0  | 2 |
| LBR     | 3930  | 0 | 0  | 0 |
| PPIE    | 10450 | 0 | 0  | 0 |
| ZMIZ1   | 57178 | 0 | 0  | 0 |
| PPARG   | 5468  | 0 | 0  | 0 |
| TERF2IP | 54386 | 0 | -2 | 0 |
| BNIP3   | 664   | 0 | 0  | 0 |
| RPP38   | 10557 | 0 | 0  | 0 |
| BCL2    | 596   | 0 | 0  | 0 |
| CAST    | 831   | 0 | 0  | 0 |
| BAG3    | 9531  | 0 | 3  | 0 |
| RBM6    | 10180 | 0 | 0  | 0 |
| CSK     | 1445  | 0 | 0  | 0 |
| GNA11   | 2767  | 0 | 0  | 0 |

|          |       |   |    |    |
|----------|-------|---|----|----|
| ALDOC    | 230   | 0 | 0  | 2  |
| TOR1A    | 1861  | 0 | 0  | 0  |
| SLC25A13 | 10165 | 0 | 0  | 0  |
| UBE2L6   | 9246  | 0 | 0  | 0  |
| SYK      | 6850  | 0 | 2  | 0  |
| TSPAN4   | 7106  | 0 | -2 | -2 |
| NR3C1    | 2908  | 0 | 0  | 0  |
| PCBD1    | 5092  | 0 | 0  | 0  |
| ICMT     | 23463 | 0 | -2 | 0  |
| TRIB3    | 57761 | 0 | 2  | 0  |
| EIF4EBP1 | 1978  | 0 | 0  | 0  |
| PHF15    | 23338 | 0 | 0  | 0  |
| CXCR4    | 7852  | 0 | 0  | 0  |
| GNPDA1   | 10007 | 0 | 0  | 0  |
| CCND3    | 896   | 0 | 0  | 0  |
| FKBP14   | 55033 | 0 | 0  | 0  |
| CIAPIN1  | 57019 | 0 | 0  | 0  |
| NUCB2    | 4925  | 0 | 0  | 0  |
| COG7     | 91949 | 0 | 0  | 0  |
| RSU1     | 6251  | 0 | 0  | 0  |
| PTPN6    | 5777  | 0 | 0  | 0  |
| TUBB6    | 84617 | 0 | 0  | 0  |
| ABL1     | 25    | 0 | 0  | 0  |
| DUSP4    | 1846  | 0 | 0  | 0  |
| CCNF     | 899   | 0 | -2 | 0  |



|         |       |    |    |   |
|---------|-------|----|----|---|
| PTPN12  | 5782  | 0  | 0  | 0 |
| HSPA1A  | 3303  | 0  | 4  | 0 |
| PCK2    | 5106  | 0  | 0  | 0 |
| FAM57A  | 79850 | 3  | 0  | 2 |
| RB1     | 5925  | 0  | 0  | 0 |
| EVL     | 51466 | 0  | -3 | 0 |
| GFPT1   | 2673  | 0  | 0  | 0 |
| BLVRA   | 644   | 0  | 0  | 0 |
| GPOR    | 2852  | 0  | 0  | 0 |
| EAPP    | 55837 | -2 | 0  | 0 |
| S100A13 | 6284  | 0  | 0  | 0 |
| EXT1    | 2131  | 0  | -3 | 0 |
| MYBL2   | 4605  | 0  | 0  | 0 |
| POLE2   | 5427  | 0  | 0  | 0 |
| STX4    | 6810  | 0  | 3  | 0 |
| PLCB3   | 5331  | 0  | 0  | 0 |
| TMC01   | 54499 | 0  | 0  | 0 |
| C2CD2   | 25966 | 0  | 0  | 0 |
| PARP1   | 142   | 0  | -3 | 0 |
| ANKRD10 | 55608 | 0  | 0  | 0 |
| CCDC85B | 11007 | 0  | -2 | 0 |
| DDB2    | 1643  | 0  | 0  | 0 |
| DDX10   | 1662  | 0  | 0  | 0 |
| BAMBI   | 25805 | 0  | 0  | 0 |
| CEP57   | 9702  | 0  | 0  | 0 |

|         |       |   |    |    |
|---------|-------|---|----|----|
| HADH    | 3033  | 0 | 0  | 0  |
| RAB31   | 11031 | 0 | 0  | 0  |
| ABCC5   | 10057 | 0 | 0  | 0  |
| GLRX    | 2745  | 0 | 0  | 0  |
| MVP     | 9961  | 0 | 0  | 0  |
| RFC5    | 5985  | 0 | 0  | 0  |
| HES1    | 3280  | 0 | 0  | 0  |
| STMN1   | 3925  | 0 | 0  | 0  |
| GALE    | 2582  | 0 | 0  | -2 |
| KLHL9   | 55958 | 0 | 0  | 0  |
| PTPRF   | 5792  | 0 | 0  | 0  |
| UBE2J1  | 51465 | 0 | 0  | 0  |
| PGM1    | 5236  | 3 | 0  | 0  |
| SLC37A4 | 2542  | 0 | 0  | 0  |
| LOXL1   | 4016  | 0 | 0  | 0  |
| PLK1    | 5347  | 0 | 0  | 0  |
| MYO10   | 4651  | 0 | -2 | 0  |
| NPRL2   | 10641 | 0 | -2 | 0  |
| LIPA    | 3988  | 0 | -2 | 0  |
| PWP1    | 11137 | 0 | 0  | 0  |
| PHGDH   | 26227 | 0 | 0  | 0  |
| PLEKHM1 | 9842  | 0 | 0  | 0  |
| ST7     | 7982  | 0 | 0  | 0  |
| VAT1    | 10493 | 0 | 0  | 0  |
| IKBKB   | 3551  | 0 | 0  | 0  |

|          |       |   |   |   |
|----------|-------|---|---|---|
| KIF20A   | 10112 | 0 | 0 | 0 |
| CDH3     | 1001  | 0 | 0 | 0 |
| PCM1     | 5108  | 0 | 0 | 0 |
| IER3     | 8870  | 0 | 2 | 0 |
| SSBP2    | 23635 | 0 | 0 | 0 |
| FAT1     | 2195  | 0 | 0 | 0 |
| SNX11    | 29916 | 0 | 0 | 0 |
| RNMT     | 8731  | 0 | 0 | 0 |
| SFN      | 2810  | 0 | 0 | 0 |
| EGFR     | 1956  | 0 | 0 | 0 |
| RFX5     | 5993  | 0 | 0 | 0 |
| NET1     | 10276 | 2 | 0 | 0 |
| PKIG     | 11142 | 0 | 0 | 0 |
| DECR1    | 1666  | 0 | 0 | 0 |
| FSD1     | 79187 | 0 | 0 | 0 |
| ATP6V1D  | 51382 | 0 | 0 | 0 |
| CDK6     | 1021  | 0 | 0 | 0 |
| CDC45    | 8318  | 2 | 0 | 0 |
| NPC1     | 4864  | 0 | 0 | 0 |
| EDEM1    | 9695  | 0 | 0 | 0 |
| MEST     | 4232  | 0 | 0 | 0 |
| MYLK     | 4638  | 0 | 0 | 0 |
| PAFAH1B3 | 5050  | 0 | 0 | 0 |
| CALU     | 813   | 0 | 0 | 0 |
| USP6NL   | 9712  | 0 | 0 | 0 |

|         |       |   |    |    |
|---------|-------|---|----|----|
| LGALS8  | 3964  | 0 | 2  | 0  |
| NT5DC2  | 64943 | 0 | 0  | 0  |
| CCP110  | 9738  | 0 | 0  | 0  |
| LRP10   | 26020 | 0 | 0  | 0  |
| ATP1B1  | 481   | 0 | 0  | 0  |
| STK10   | 6793  | 0 | -2 | -2 |
| OXCT1   | 5019  | 0 | 0  | 0  |
| UGDH    | 7358  | 0 | 0  | 0  |
| SLC25A4 | 291   | 0 | 0  | 0  |
| SQRDL   | 58472 | 0 | 0  | 0  |
| HEBP1   | 50865 | 0 | 0  | 0  |
| PSMB10  | 5699  | 0 | 0  | 0  |
| ASCC3   | 10973 | 0 | 0  | 0  |
| FGFR4   | 2264  | 0 | 0  | 0  |
| CDKN2A  | 1029  | 0 | 0  | 0  |
| TRAM2   | 9697  | 0 | 0  | 0  |
| ATP11B  | 23200 | 0 | 0  | 0  |
| PYCR1   | 5831  | 0 | 0  | 0  |
| CD320   | 51293 | 0 | -2 | 0  |
| NCOA3   | 8202  | 0 | 0  | 0  |
| CDKN1B  | 1027  | 0 | -2 | 0  |
| POLD4   | 57804 | 0 | 0  | 0  |
| FOSL1   | 8061  | 0 | 2  | 0  |
| MLLT11  | 10962 | 0 | 2  | 0  |
| CEBPZ   | 10153 | 0 | 0  | -2 |

|        |       |   |   |   |
|--------|-------|---|---|---|
| PRKACA | 5566  | 0 | 0 | 0 |
| GAPDH  | 2597  | 0 | 0 | 0 |
| CBR3   | 874   | 0 | 2 | 0 |
| LYRM1  | 57149 | 0 | 0 | 0 |
